# Supplementary material for: O-Phenylenediamine: a privileged pharmacophore of ferrostatins for radical-trapping reactivity in blocking ferroptosis
Source: Royal Society of Chemistry journal article supplement (doi:10.1039/c8ob00546j), 2018-01-01
Supplement: c8ob00546j1.pdf [file c8ob00546j1.pdf]

# *O*-phenylenediamine: A Privileged Pharmacophore of Ferrostatins for Radical-Trapping Activity in Blocking Ferroptosis

Xie-Huang Sheng<sup>†</sup>, Cheng-Cheng Cui<sup>†</sup>, Chao Shan<sup>†</sup>, Yu-Zhen Li<sup>†</sup>, Duo-Hong Sheng<sup>‡</sup>,

Bin Sun<sup>†\*</sup>, De-Zhan Chen<sup>†\*</sup>

<sup>†</sup>College of Chemistry, Chemical Engineering and Materials Science, Collaborative Innovation Center of Functionalized Probes for Chemical Imaging in Universities of Shandong, Key Laboratory of Molecular and Nano Probes, Ministry of Education, Shandong Provincial Key Laboratory of Clean Production of Fine Chemicals, Shandong Normal University, Jinan 250014, P. R. China

<sup>‡</sup>State Key Laboratory of Microbial Technology, Shandong University, Jinan 250100, P. R. China

## Table of Contents

|                                                        |       |
|--------------------------------------------------------|-------|
| ■ Tab S1                                               | 2     |
| ■ Fig S1                                               | 3     |
| ■ Site Selectivity of H-atom Abstraction               | 4     |
| ■ Fig S2                                               | 5     |
| ■ Fig S3                                               | 5     |
| ■ The <sup>13</sup> C NMR spectra                      | 6-12  |
| ■ Cartesian Coordinates(Å) of the Optimized Structures | 13-41 |

**Tab. S1** The experimental and computational data of compound **1-13**.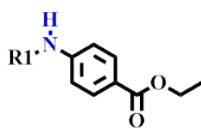

| NO.        | R1-Compound<br>s  | cLogP <sup>a</sup> | MNTD <sup>b</sup> | EC <sub>50</sub><br>(nM) | BDE<br>kcal<br>mol <sup>-1</sup> | ΔE<br>kcal<br>mol <sup>-1</sup> |
|------------|-------------------|--------------------|-------------------|--------------------------|----------------------------------|---------------------------------|
| <b>Fer</b> | /                 | 2.9                | 125000            | 50                       | 80                               | 10.45                           |
| <b>1</b>   |                   | 4.91               | 12500             | >12500                   | 88                               | 18.80                           |
| <b>2</b>   |                   | 3.67               | 12500             | >12500                   | 87                               | 18.11                           |
| <b>3</b>   | CH <sub>3</sub> - | 2.72               | 12500             | >12500                   | 88                               | 19.85                           |
| <b>4</b>   |                   | 3.68               | 12500             | >12500                   | 88                               | 21.32                           |
| <b>5</b>   |                   | 3.78               | 12500             | >12500                   | 88                               | 17.58                           |
| <b>6</b>   |                   | 4.29               | 6250              | >6250                    | 88                               | 18.29                           |
| <b>7</b>   |                   | 3.77               | 12500             | >12500                   | 88                               | 17.74                           |
| <b>8</b>   |                   | 2.99               | 12500             | >12500                   | 89                               | 18.39                           |
| <b>9</b>   |                   | 2.50               | 12500             | >12500                   | 88                               | 19.85                           |
| <b>10</b>  |                   | 3.74               | 12500             | >12500                   | 89                               | 17.51                           |
| <b>11</b>  |                   | 4.19               | 12500             | >12500                   | 89                               | 17.23                           |
| <b>12</b>  |                   | 3.90               | 12500             | >12500                   | 89                               | 17.25                           |
| <b>13</b>  |                   | 4.42               | 12500             | >12500                   | 89                               | 17.41                           |

**a:** The calculated octanol-water partition coefficient (clog P) is predicted by using the Molinspiration Cheminformatics server (<http://www.molinspiration.com>). **b:** MNTD means the maximum non-toxic dose.

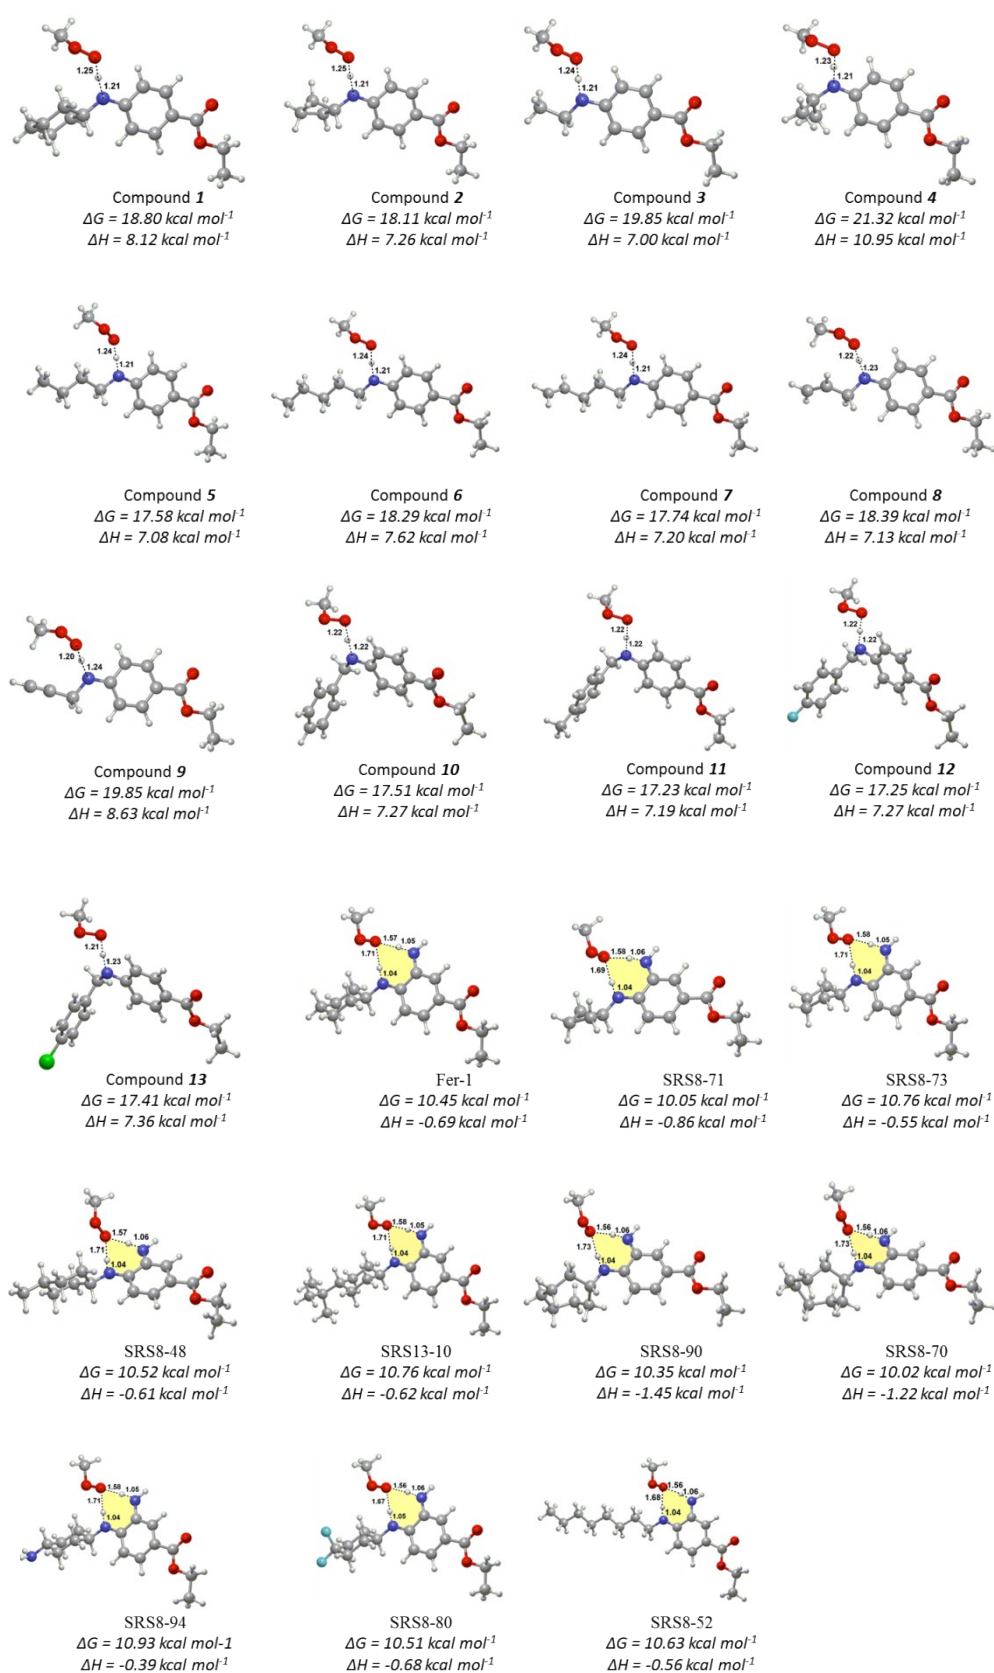

Fig S1 Transition States Structures of serial *R1* and serial *R2*

### Site Selectivity of H-atom Abstraction

Fer-1 possesses three candidate hydrogens from two  $-NH_2$  groups that may represent attack sites by lipid peroxide radical. Therefore, we first check the H-atom transfer reaction between each  $-NH$  group and  $CH_3OO\cdot$  to determine the most reactive site. However, we have just found two possible H-abstraction paths occur at position  $H_{3'}$  and  $H_{3''}$  by quantum calculation. The possible mechanisms are listed in Figure S1. The required energy barrier for transferring the hydrogen atom from  $-NH$  groups to methylperoxyl radical is calculated: 10.45 ( $H_{3'}$ ) and 17.57 ( $H_{3''}$ ). It is clear that the reactivity order is  $H_{3'} > H_{3''}$ . Corresponding, the BDE (N-H) value at position 3' is 79.81 kcal mol<sup>-1</sup>, which is also significantly smaller than that of position 3'' with the value of 87.23 kcal mol<sup>-1</sup>.

The most obvious difference between two reaction paths is geometric feature of transition state. For position 3', the two hydrogen atoms of *ortho*-diamines interact with methylperoxyl radical together and form a stable seven-membered ring in help of the reaction energetically favorable. For position 3'', one hydrogen atom of  $-NH$  group interacts with radical and forms a linear transition structure with less compact, leading the H-atom abstract reaction is endothermic. The above results reveal that  $H_{3'}$  is the most favorable site in trapping lipid radical.

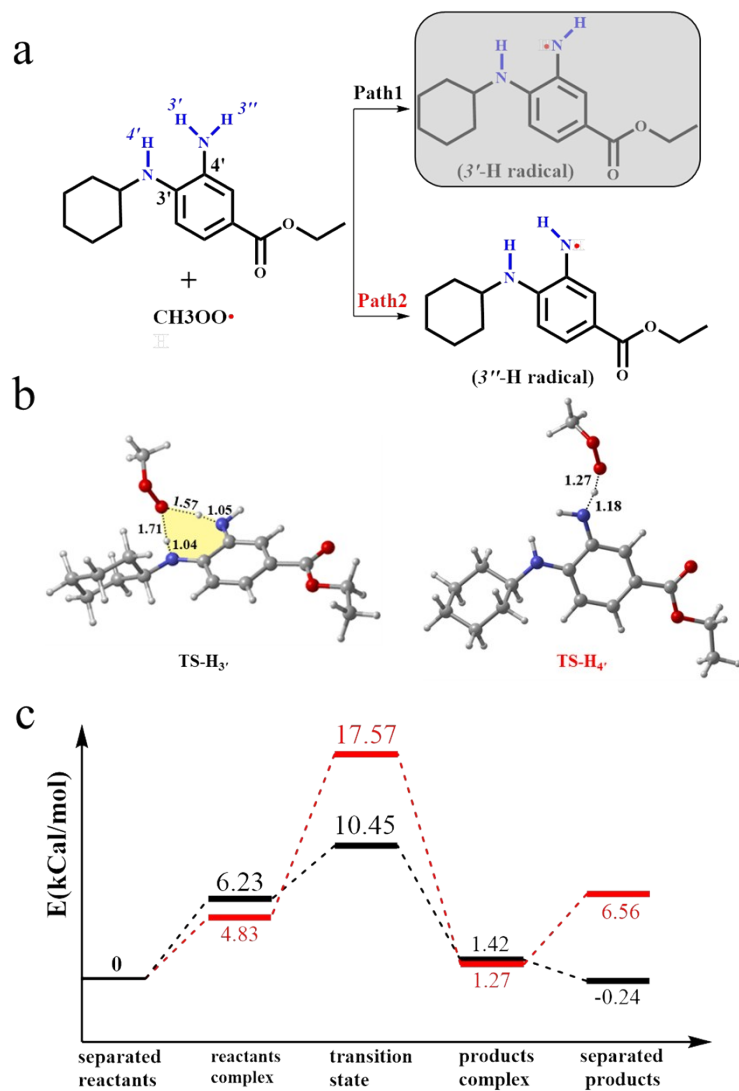

Fig S2 (a) Possible Reactions between Fer-1 and  $\text{CH}_3\text{OO}\cdot$ . (b) Optimized structures of transition state for the two reactions. (c) Potential energy profiles for  $\text{CH}_3\text{OO}\cdot$  with the  $\text{H}_{3'}$  (black line) and  $\text{H}_{3''}$  (blue line) site of Fer-1 (values are given in kcal/mol).

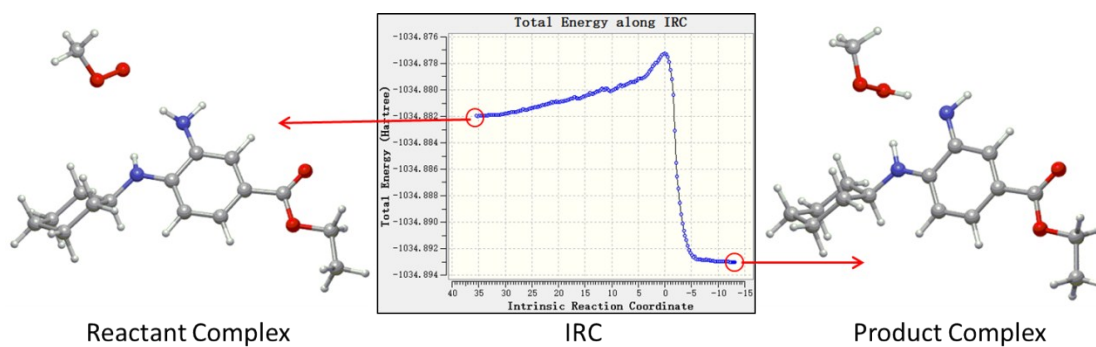

Fig S3 Intrinsic Reaction Coordinate (IRC) of the reaction between Fer-1 and methylperoxy radical

The <sup>13</sup>C NMR spectra of the synthetic compounds

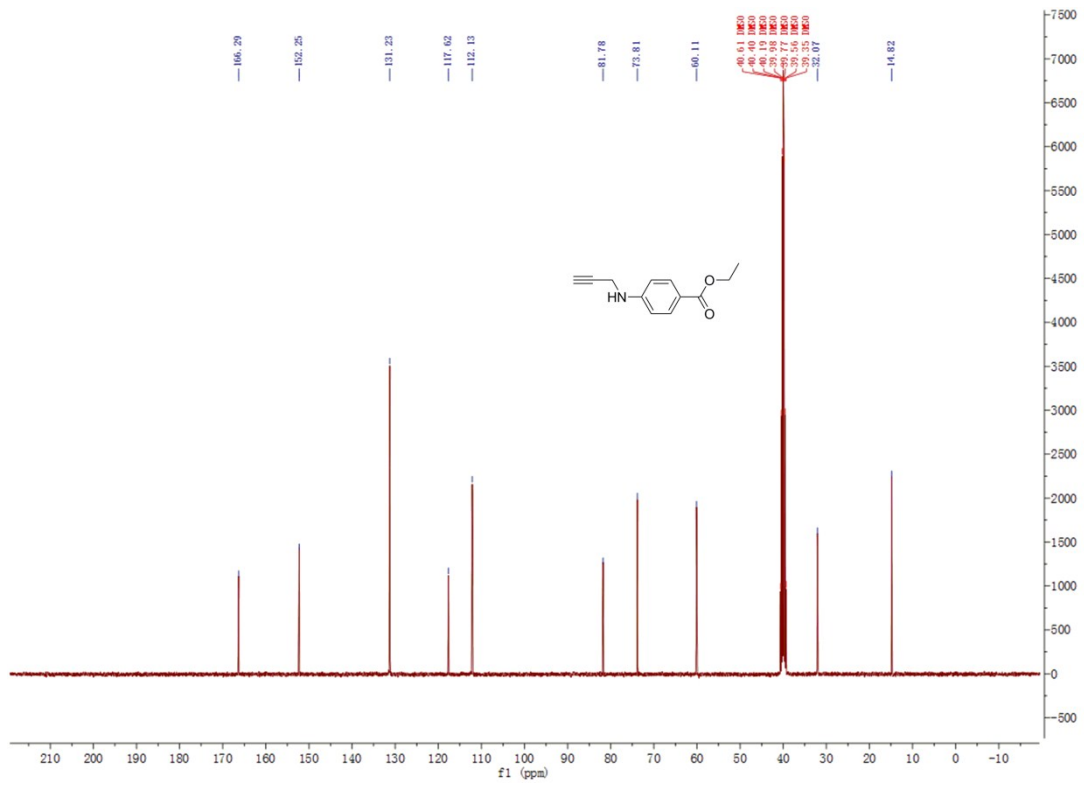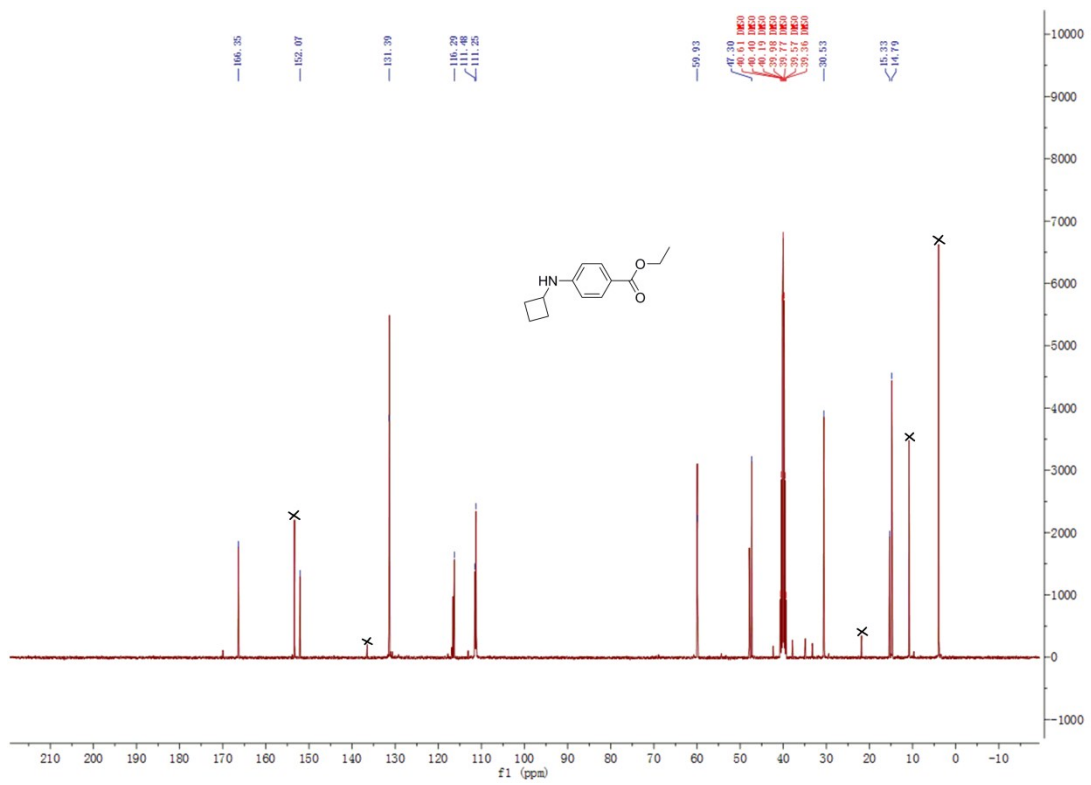

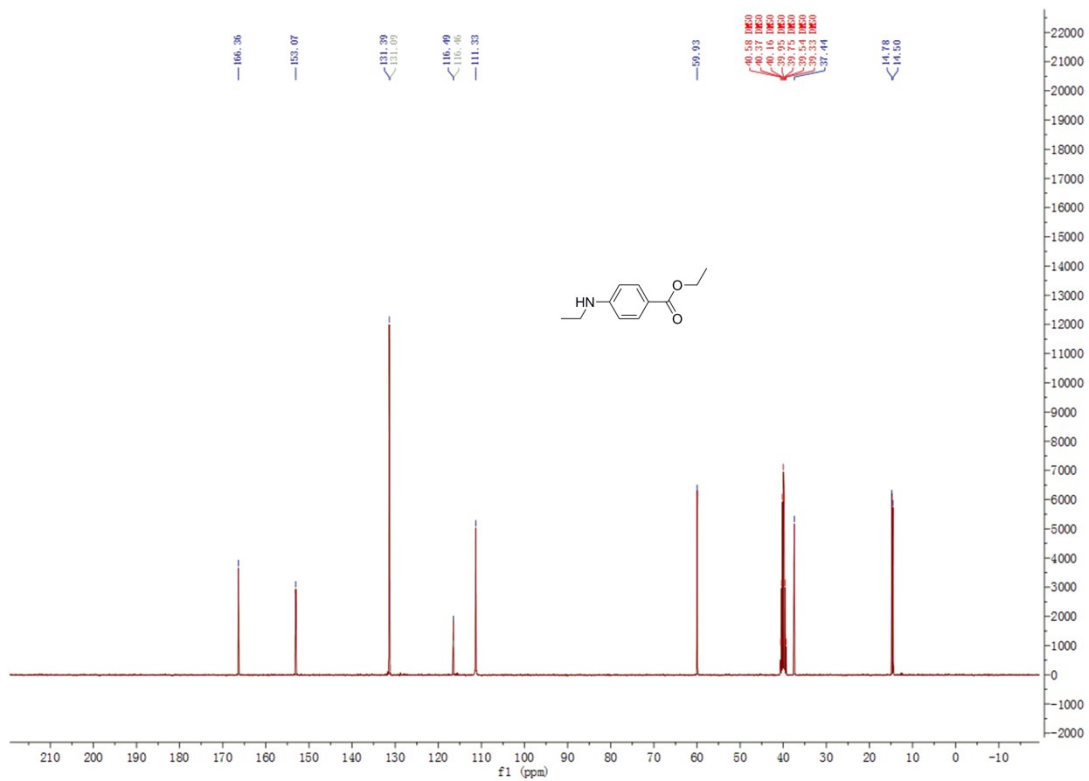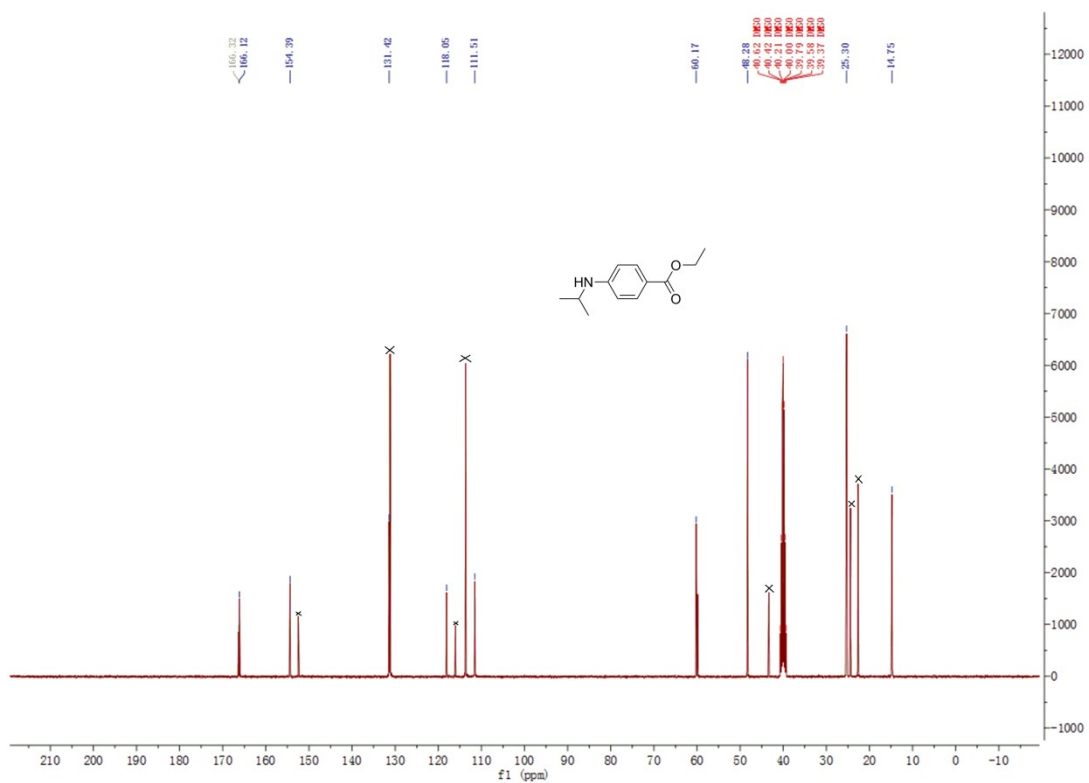

zhou0426.4.fid

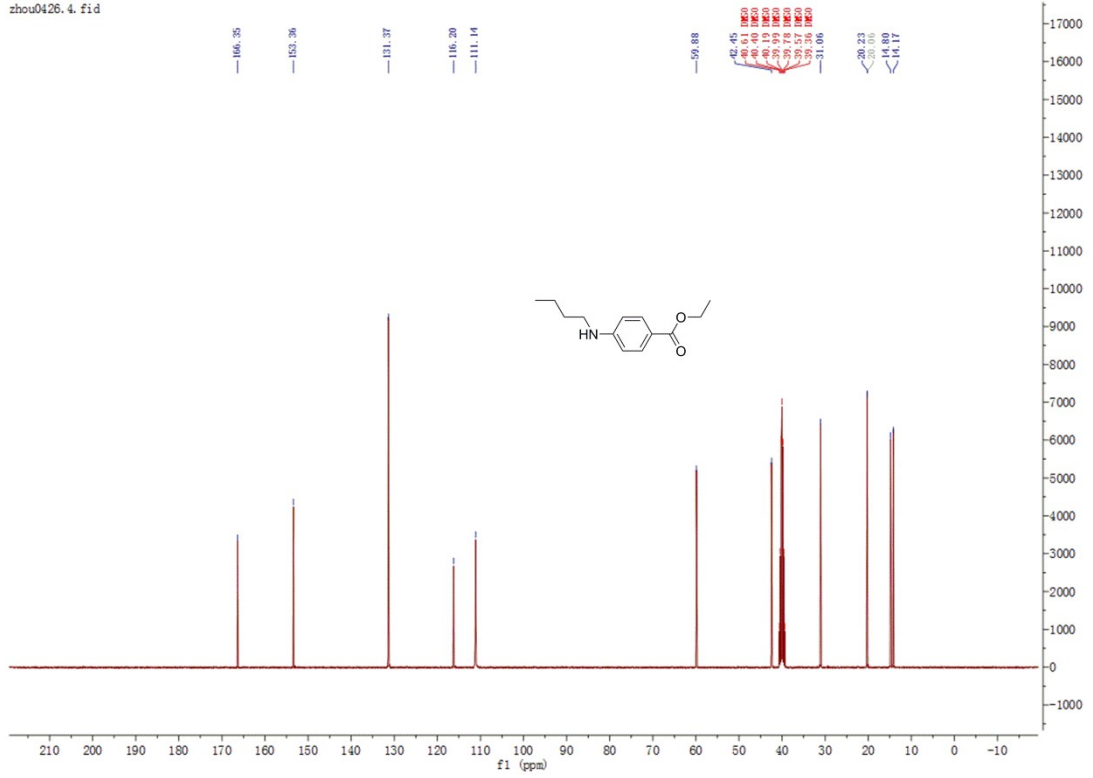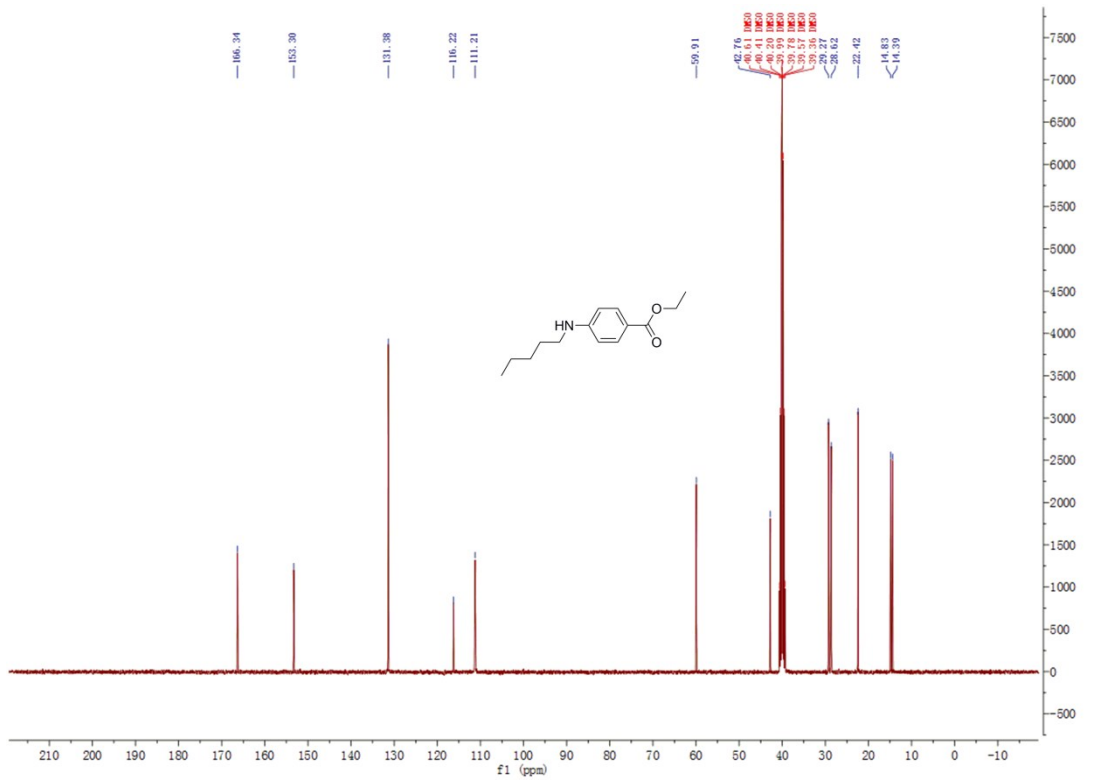



zhou0426.3.fid

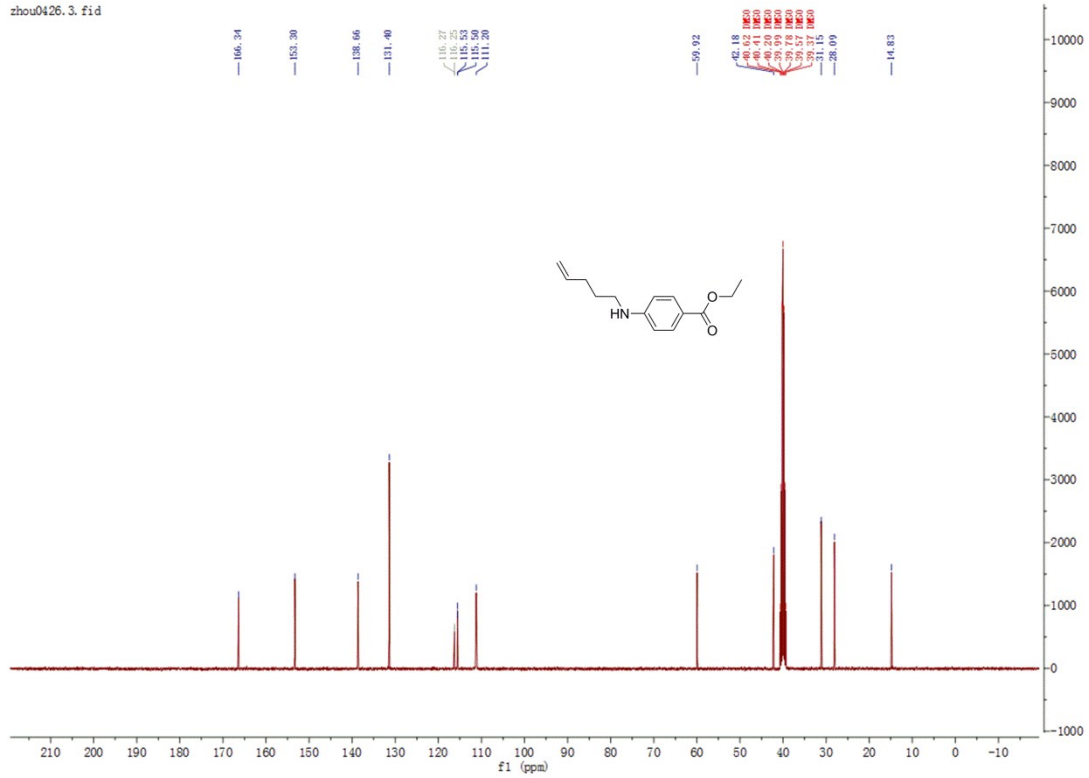

zhou0426.2.fid

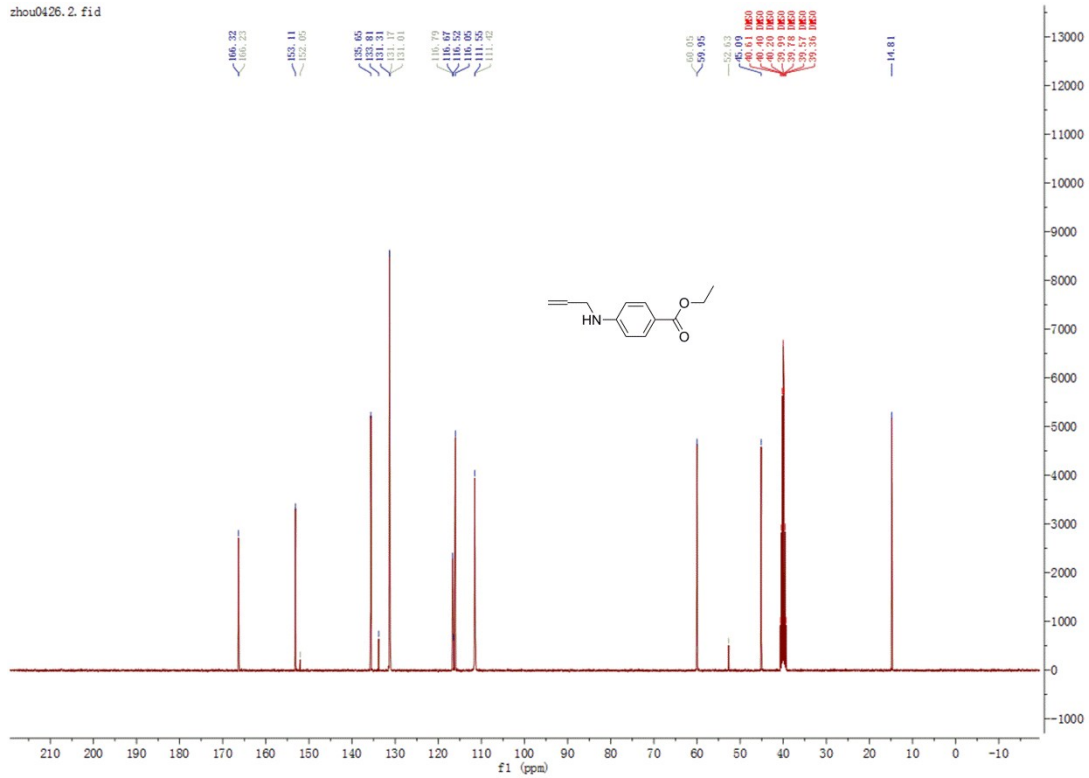

zhou0426.1.fid

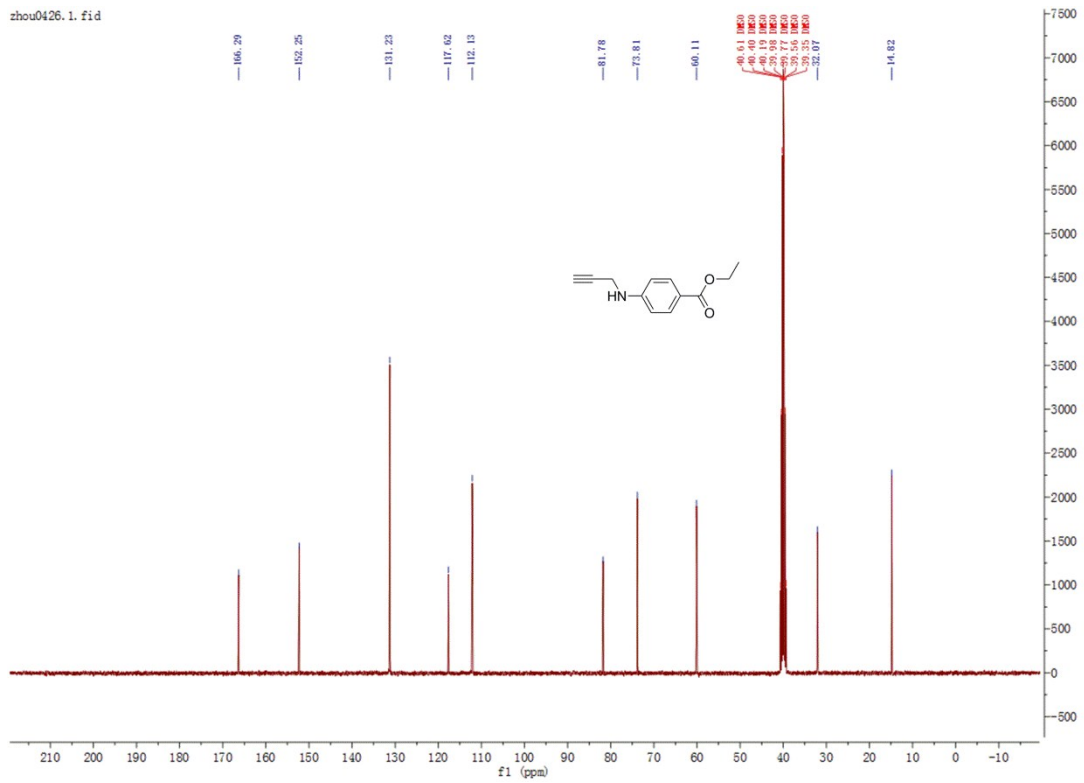

zhou0426.5.fid

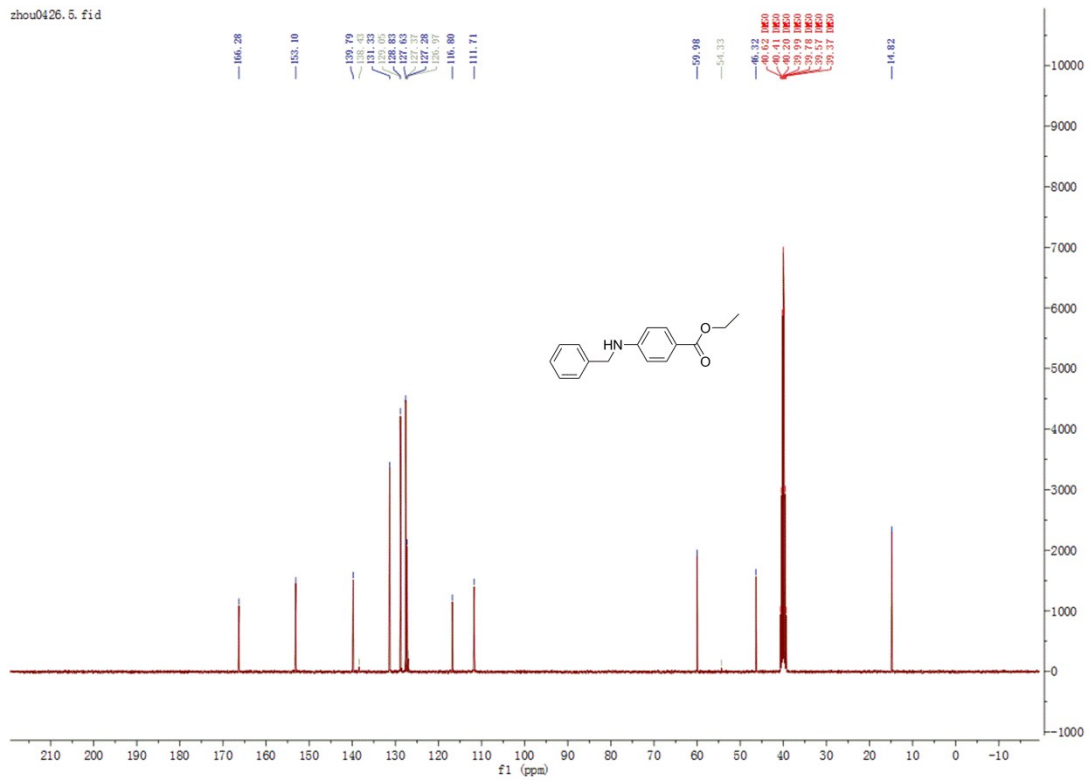

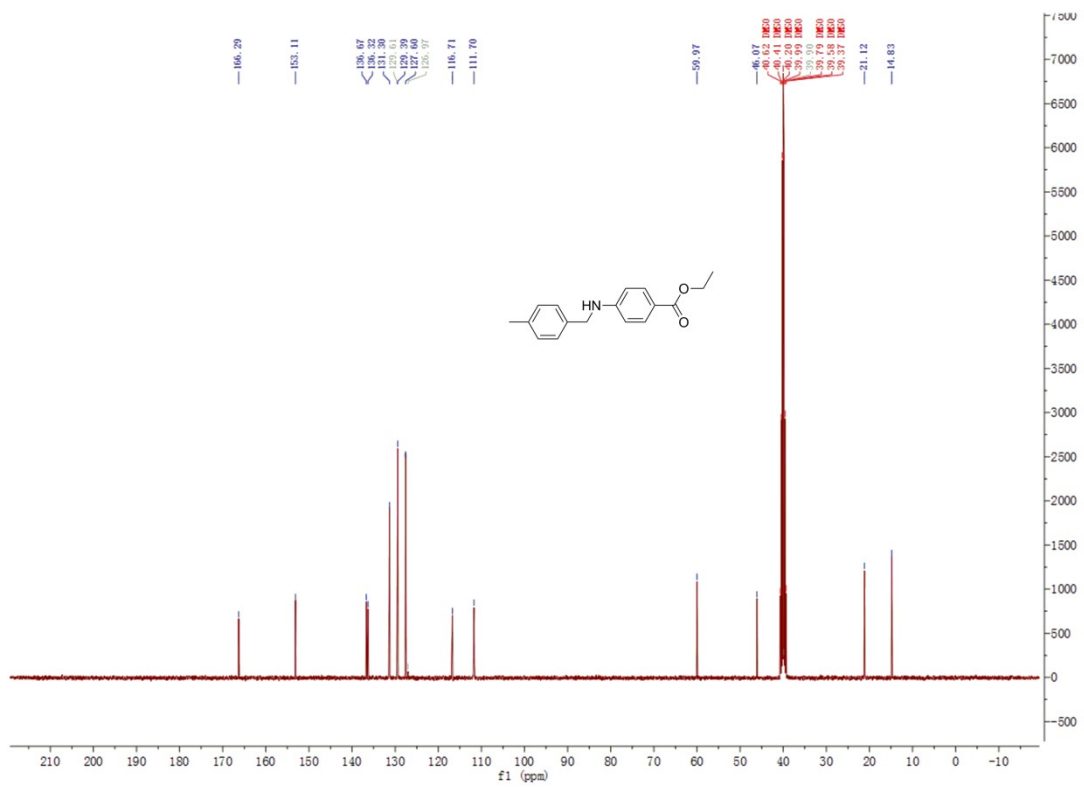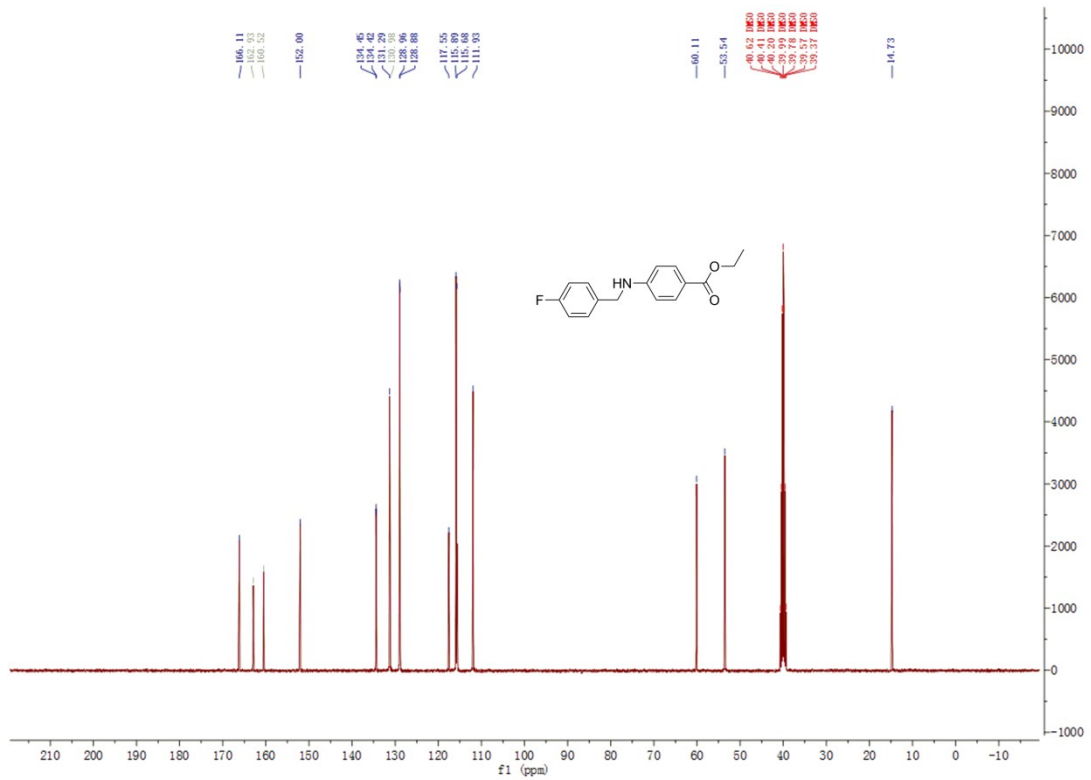

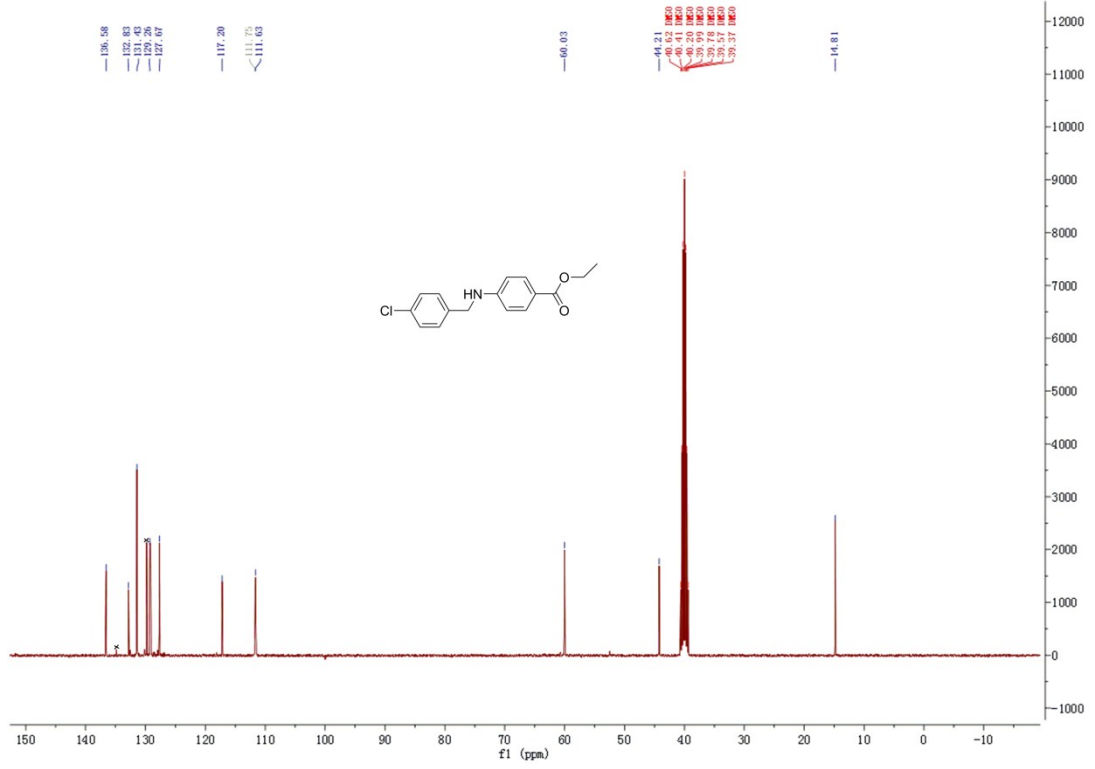

## COORDINATES OF THE STATIONARY POINTS

Optimized molecular geometries in Cartesian coordinates

|                |          |          |          |                          |          |          |          |
|----------------|----------|----------|----------|--------------------------|----------|----------|----------|
| <b>[Fer-1]</b> |          |          |          | H                        | 5.90836  | -2.15409 | 1.4358   |
|                |          |          |          | H                        | 4.39491  | -2.27776 | 2.41822  |
| C              | 0.20167  | -1.21896 | -0.02942 | C                        | 5.94374  | -4.84846 | 0.67441  |
| C              | -0.0682  | 0.15094  | -0.00106 | H                        | 5.6752   | -5.15864 | -1.45192 |
| C              | 0.99424  | 1.06237  | -0.00113 | H                        | 4.16053  | -5.28365 | -0.47178 |
| C              | 2.31093  | 0.62868  | -0.01387 | H                        | 5.92762  | -4.24197 | 2.75319  |
| C              | 2.58174  | -0.75868 | 0.00276  | H                        | 4.31428  | -4.72304 | 2.09275  |
| C              | 1.51747  | -1.6632  | -0.02744 | H                        | 6.10411  | -5.93436 | 0.90181  |
| H              | -0.61458 | -1.93023 | -0.04125 | H                        | 6.95251  | -4.38532 | 0.51249  |
| H              | 0.7635   | 2.12314  | -0.00166 |                          |          |          |          |
| H              | 1.72924  | -2.72848 | -0.02965 | <b>[Fer-1] _TS (H3')</b> |          |          |          |
| N              | 3.40721  | 1.50714  | 0.02671  | C                        | 1.78646  | -0.97157 | 0.1692   |
| H              | 3.13654  | 2.47935  | -0.01742 | C                        | 2.50643  | 0.0923   | -0.37388 |
| H              | 4.09798  | 1.30869  | -0.68812 | C                        | 1.81121  | 1.1542   | -0.96971 |
| N              | 3.90972  | -1.16641 | -0.00597 | C                        | 0.42909  | 1.16016  | -1.04359 |
| H              | 4.52273  | -0.56815 | 0.53324  | C                        | -0.30279 | 0.05776  | -0.5217  |
| C              | -1.44127 | 0.69706  | 0.01323  | C                        | 0.39803  | -0.98573 | 0.09834  |
| O              | -1.71115 | 1.88245  | 0.03732  | H                        | 2.31221  | -1.79226 | 0.64136  |
| O              | -2.38525 | -0.2628  | -0.00372 | H                        | 2.38451  | 1.98236  | -1.37506 |
| C              | -3.7442  | 0.19697  | 0.00925  | H                        | -0.14342 | -1.82829 | 0.51132  |
| H              | -3.90199 | 0.80552  | 0.90385  | N                        | -0.29958 | 2.17611  | -1.69026 |
| H              | -3.90716 | 0.84037  | -0.85968 | H                        | 0.29896  | 2.86117  | -2.13009 |
| C              | -4.63835 | -1.02039 | -0.01219 | H                        | -0.96657 | 2.65038  | -1.08571 |
| H              | -4.46094 | -1.65238 | 0.86116  | N                        | -1.67658 | 0.09447  | -0.64613 |
| H              | -5.68613 | -0.70884 | -0.00255 | H                        | -1.97024 | 0.70123  | -1.40295 |
| H              | -4.46675 | -1.61698 | -0.91122 | C                        | 3.97973  | 0.16574  | -0.33777 |
| C              | 4.12323  | -2.58996 | 0.29205  | O                        | 4.63736  | 1.07956  | -0.79839 |
| C              | 4.80332  | -3.25898 | -0.88508 | O                        | 4.54208  | -0.89821 | 0.26895  |
| C              | 4.95075  | -2.72617 | 1.55427  | C                        | 5.97457  | -0.8932  | 0.33585  |
| H              | 3.11572  | -3.0554  | 0.45468  | H                        | 6.37552  | -0.84379 | -0.68028 |
| C              | 5.11808  | -4.71103 | -0.58836 | H                        | 6.30086  | 0.00826  | 0.86179  |
| H              | 5.75353  | -2.71342 | -1.12557 | C                        | 6.40312  | -2.15216 | 1.05225  |
| H              | 4.14087  | -3.19533 | -1.78716 | H                        | 6.07034  | -3.04279 | 0.51398  |
| C              | 5.26481  | -4.1783  | 1.85143  |                          |          |          |          |

|                          |          |          |          |   |          |          |          |
|--------------------------|----------|----------|----------|---|----------|----------|----------|
| H                        | 7.49349  | -2.18306 | 1.12424  | H | 0.31245  | 3.31984  | -0.96155 |
| H                        | 5.99211  | -2.18653 | 2.06402  | H | -1.22882 | 2.54674  | -0.764   |
| C                        | -2.52589 | -1.06622 | -0.4239  | N | -1.50555 | 0.01238  | -0.69134 |
| C                        | -2.95102 | -1.18942 | 1.04387  | H | -2.0423  | 0.90248  | -0.68495 |
| C                        | -3.75863 | -0.97596 | -1.32312 | C | 4.0953   | 0.44684  | -0.04415 |
| H                        | -1.97338 | -1.97754 | -0.70528 | O | 4.67905  | 1.50797  | -0.11834 |
| C                        | -3.87432 | -2.38834 | 1.26045  | O | 4.72067  | -0.71989 | 0.19494  |
| H                        | -3.47184 | -0.26435 | 1.32304  | C | 6.14287  | -0.63304 | 0.35439  |
| H                        | -2.06889 | -1.26059 | 1.68862  | H | 6.57322  | -0.18433 | -0.54505 |
| C                        | -4.69699 | -2.16398 | -1.11184 | H | 6.36588  | 0.03705  | 1.18918  |
| H                        | -4.29124 | -0.04184 | -1.09703 | C | 6.66032  | -2.03104 | 0.59446  |
| H                        | -3.44504 | -0.92205 | -2.37195 | H | 6.42603  | -2.68395 | -0.24903 |
| C                        | -5.102   | -2.31008 | 0.35446  | H | 7.74534  | -2.00897 | 0.72004  |
| H                        | -4.17702 | -2.44118 | 2.31137  | H | 6.21963  | -2.46158 | 1.49621  |
| H                        | -3.3254  | -3.31613 | 1.04955  | C | -2.32112 | -1.16771 | -0.46556 |
| H                        | -5.5835  | -2.05115 | -1.74424 | C | -2.59856 | -1.39288 | 1.02815  |
| H                        | -4.19463 | -3.08268 | -1.44213 | C | -3.63071 | -1.01686 | -1.24254 |
| H                        | -5.73067 | -3.19694 | 0.48632  | H | -1.7884  | -2.03971 | -0.86585 |
| H                        | -5.7127  | -1.44637 | 0.64902  | C | -3.51847 | -2.59345 | 1.24727  |
| C                        | -1.34284 | 2.68698  | 1.97276  | H | -3.06289 | -0.48228 | 1.42428  |
| H                        | -1.46953 | 2.60491  | 3.05147  | H | -1.65294 | -1.52418 | 1.56394  |
| H                        | -0.40453 | 3.18516  | 1.72655  | C | -4.55176 | -2.21487 | -1.01861 |
| H                        | -1.40733 | 1.71209  | 1.48776  | H | -4.12582 | -0.09584 | -0.91143 |
| O                        | -2.44302 | 3.5046   | 1.52445  | H | -3.40816 | -0.89155 | -2.30668 |
| O                        | -2.4194  | 3.68343  | 0.23111  | C | -4.82356 | -2.44622 | 0.46684  |
| <b>[Fer-1] _TS (H3')</b> |          |          |          | H | -3.72225 | -2.71368 | 2.31602  |
| C                        | 1.99112  | -0.96769 | -0.10194 | H | -3.00629 | -3.51007 | 0.92517  |
| C                        | 2.63456  | 0.28186  | -0.20451 | H | -5.49034 | -2.06509 | -1.56112 |
| C                        | 1.88201  | 1.41452  | -0.46196 | H | -4.08768 | -3.11406 | -1.44509 |
| C                        | 0.49415  | 1.35285  | -0.6574  | H | -5.45104 | -3.33267 | 0.60457  |
| C                        | -0.17019 | 0.07425  | -0.53098 | H | -5.38905 | -1.5954  | 0.86747  |
| C                        | 0.62758  | -1.06208 | -0.25174 | C | -3.20902 | 3.62218  | 1.49491  |
| H                        | 2.57864  | -1.85257 | 0.10686  | H | -3.4415  | 3.50372  | 2.55555  |
| H                        | 2.39365  | 2.36857  | -0.53751 | H | -4.04157 | 4.11077  | 0.97914  |
| H                        | 0.14953  | -2.02756 | -0.15007 | H | -2.30546 | 4.23273  | 1.37862  |
| N                        | -0.20737 | 2.45625  | -1.02441 | O | -3.00148 | 2.32335  | 0.99244  |
|                          |          |          |          | O | -2.74279 | 2.4237   | -0.36582 |

**[Fer-1] \_PC(H3')**

|   |          |          |          |
|---|----------|----------|----------|
| C | 2.11207  | -0.90003 | -0.07178 |
| C | 2.7083   | 0.38208  | -0.12681 |
| C | 1.90406  | 1.49254  | -0.26689 |
| C | 0.48451  | 1.39941  | -0.35924 |
| C | -0.11059 | 0.06293  | -0.32332 |
| C | 0.74489  | -1.05041 | -0.16432 |
| H | 2.74349  | -1.77188 | 0.04635  |
| H | 2.36723  | 2.47387  | -0.30293 |
| H | 0.32103  | -2.045   | -0.11182 |
| N | -0.30488 | 2.45914  | -0.47294 |
| H | 0.24948  | 3.31241  | -0.49027 |
| H | -1.99425 | 2.66083  | -0.48909 |
| N | -1.44054 | -0.05477 | -0.45523 |
| H | -1.98699 | 0.80006  | -0.53061 |
| C | 4.17175  | 0.58563  | -0.03505 |
| O | 4.71936  | 1.66868  | -0.08361 |
| O | 4.84424  | -0.56984 | 0.11019  |
| C | 6.2729   | -0.45525 | 0.20729  |
| H | 6.64803  | 0.02708  | -0.6993  |
| H | 6.51569  | 0.19488  | 1.05196  |
| C | 6.83241  | -1.84692 | 0.38256  |
| H | 6.57758  | -2.48289 | -0.46843 |
| H | 7.92166  | -1.79836 | 0.45933  |
| H | 6.44604  | -2.31361 | 1.29167  |
| C | -2.20261 | -1.28977 | -0.38465 |
| C | -2.46608 | -1.71725 | 1.06556  |
| C | -3.51736 | -1.11635 | -1.14622 |
| H | -1.62419 | -2.07625 | -0.88737 |
| C | -3.30557 | -2.99343 | 1.1212   |
| H | -2.994   | -0.8991  | 1.57056  |
| H | -1.51627 | -1.85308 | 1.59313  |
| C | -4.36228 | -2.38844 | -1.08559 |
| H | -4.07213 | -0.27872 | -0.70537 |
| H | -3.30405 | -0.84331 | -2.18473 |
| C | -4.61763 | -2.82933 | 0.35526  |
| H | -3.50134 | -3.26279 | 2.16422  |

|   |          |          |          |
|---|----------|----------|----------|
| H | -2.73484 | -3.82627 | 0.68783  |
| H | -5.3097  | -2.22482 | -1.60904 |
| H | -3.84576 | -3.19417 | -1.62453 |
| H | -5.18645 | -3.76502 | 0.37024  |
| H | -5.23717 | -2.07615 | 0.85922  |
| C | -4.1067  | 3.76133  | 1.0128   |
| H | -4.44743 | 3.71631  | 2.05041  |
| H | -4.96901 | 3.83246  | 0.34202  |
| H | -3.4582  | 4.63373  | 0.87431  |
| O | -3.40353 | 2.5583   | 0.80804  |
| O | -2.99044 | 2.54897  | -0.56531 |

**[Fer-1] \_RC (H3'')**

|   |          |          |          |
|---|----------|----------|----------|
| C | -1.62343 | -1.36449 | 0.1094   |
| C | -2.30469 | -0.17193 | -0.13192 |
| C | -1.58775 | 0.97433  | -0.47519 |
| C | -0.20116 | 0.94766  | -0.56714 |
| C | 0.50034  | -0.23672 | -0.21306 |
| C | -0.23374 | -1.38749 | 0.0776   |
| H | -2.17723 | -2.2643  | 0.34342  |
| H | -2.13315 | 1.88151  | -0.71024 |
| H | 0.28317  | -2.31137 | 0.30737  |
| N | 0.49773  | 2.044    | -0.99971 |
| H | 0.09764  | 2.96204  | -0.9172  |
| H | 1.46126  | 1.9548   | -1.26123 |
| N | 1.89566  | -0.16507 | -0.19547 |
| H | 2.20153  | 0.70152  | 0.23196  |
| C | -3.77785 | -0.07058 | -0.08199 |
| O | -4.41382 | 0.94332  | -0.28336 |
| O | -4.36048 | -1.2486  | 0.21669  |
| C | -5.78853 | -1.23075 | 0.28482  |
| H | -6.10203 | -0.5076  | 1.0432   |
| H | -6.18897 | -0.88734 | -0.67326 |
| C | -6.24021 | -2.63303 | 0.61828  |
| H | -5.82678 | -2.95743 | 1.57577  |
| H | -7.33019 | -2.67006 | 0.68442  |
| H | -5.91866 | -3.33858 | -0.15095 |

|   |         |          |          |   |          |          |          |
|---|---------|----------|----------|---|----------|----------|----------|
| C | 2.71702 | -1.29785 | 0.2066   | N | 1.82025  | -0.13122 | -0.17905 |
| C | 2.92941 | -2.26661 | -0.96091 | H | 2.19714  | 0.77178  | 0.07025  |
| C | 4.06504 | -0.78859 | 0.71744  | C | -3.84617 | -0.01513 | -0.0983  |
| H | 2.23743 | -1.84642 | 1.03538  | O | -4.48312 | 0.99603  | -0.29859 |
| C | 3.84354 | -3.4268  | -0.56888 | O | -4.41811 | -1.19644 | 0.20162  |
| H | 3.37515 | -1.70028 | -1.78758 | C | -5.84988 | -1.18376 | 0.27268  |
| H | 1.96549 | -2.63655 | -1.32266 | H | -6.16069 | -0.4608  | 1.03183  |
| C | 4.99266 | -1.93833 | 1.10863  | H | -6.24961 | -0.8396  | -0.68504 |
| H | 4.53334 | -0.18935 | -0.07504 | C | -6.30129 | -2.58573 | 0.60573  |
| H | 3.90679 | -0.12289 | 1.57474  | H | -5.88989 | -2.91126 | 1.56365  |
| C | 5.18678 | -2.92101 | -0.04515 | H | -7.39127 | -2.61961 | 0.67158  |
| H | 3.99293 | -4.0903  | -1.42627 | H | -5.98246 | -3.29196 | -0.16396 |
| H | 3.35613 | -4.03036 | 0.20807  | C | 2.65787  | -1.25846 | 0.19732  |
| H | 5.95695 | -1.54056 | 1.4404   | C | 2.86804  | -2.22043 | -0.97664 |
| H | 4.56368 | -2.46924 | 1.96793  | C | 4.00221  | -0.74094 | 0.70736  |
| H | 5.81405 | -3.75935 | 0.27443  | H | 2.17976  | -1.80959 | 1.02303  |
| H | 5.72527 | -2.41973 | -0.85978 | C | 3.78141  | -3.38034 | -0.58335 |
| C | 2.41052 | 5.22178  | 0.58763  | H | 3.31511  | -1.65345 | -1.80207 |
| H | 2.96855 | 5.96009  | 0.01237  | H | 1.90416  | -2.58961 | -1.33939 |
| H | 2.98162 | 4.29614  | 0.68488  | C | 4.93004  | -1.89099 | 1.09627  |
| H | 2.15151 | 5.60976  | 1.57318  | H | 4.47073  | -0.14234 | -0.08562 |
| O | 1.21402 | 4.96947  | -0.15449 | H | 3.84147  | -0.07593 | 1.56376  |
| O | 0.4182  | 4.1685   | 0.52996  | C | 5.12349  | -2.87327 | -0.05802 |

**[Fer-1] \_TS (H3'')**

|   |          |          |          |
|---|----------|----------|----------|
| C | -1.67462 | -1.30005 | 0.08293  |
| C | -2.36874 | -0.10232 | -0.15027 |
| C | -1.65779 | 1.04456  | -0.46704 |
| C | -0.25399 | 1.03718  | -0.55365 |
| C | 0.45006  | -0.1725  | -0.22056 |
| C | -0.29085 | -1.33281 | 0.04613  |
| H | -2.23054 | -2.20056 | 0.31165  |
| H | -2.1921  | 1.96139  | -0.68743 |
| H | 0.22129  | -2.26163 | 0.2633   |
| N | 0.38432  | 2.16214  | -0.96795 |
| H | 0.2171   | 3.18665  | -0.38332 |
| H | 1.36533  | 2.01971  | -1.17984 |

**[Fer-1] \_PC (H3'')**

|   |         |          |          |
|---|---------|----------|----------|
| H | 3.29215 | -3.98352 | 0.19267  |
| H | 5.89396 | -1.49218 | 1.42655  |
| H | 4.50235 | -2.42118 | 1.95653  |
| H | 5.75011 | -3.71161 | 0.2619   |
| H | 5.66276 | -2.37251 | -0.87225 |
| C | 2.30119 | 5.23993  | 0.56948  |
| H | 2.87719 | 6.0009   | 0.03856  |
| H | 2.89639 | 4.32388  | 0.66881  |
| H | 2.03258 | 5.60151  | 1.5666   |
| O | 1.1492  | 5.01234  | -0.20928 |
| O | 0.36299 | 4.08915  | 0.46093  |



|   |          |          |          |
|---|----------|----------|----------|
| C | -1.61247 | -1.3585  | 0.10126  |
| C | -2.30626 | -0.15438 | -0.13917 |
| C | -1.59728 | 0.9832   | -0.45929 |
| C | -0.18065 | 0.96368  | -0.58413 |
| C | 0.51907  | -0.25383 | -0.21166 |
| C | -0.22893 | -1.40494 | 0.07082  |
| H | -2.17546 | -2.25279 | 0.33687  |
| H | -2.11923 | 1.90691  | -0.67952 |
| H | 0.27366  | -2.33596 | 0.30067  |
| N | 0.41881  | 2.05384  | -1.04541 |
| H | 0.22442  | 3.46633  | -0.15572 |
| H | 1.40344  | 1.89478  | -1.25314 |
| N | 1.87599  | -0.2057  | -0.14828 |
| H | 2.27585  | 0.71197  | -0.02734 |
| C | -3.78475 | -0.06358 | -0.08442 |
| O | -4.41851 | 0.94855  | -0.28542 |
| O | -4.35479 | -1.24414 | 0.2153   |
| C | -5.78725 | -1.23296 | 0.28599  |
| H | -6.09799 | -0.51007 | 1.04507  |
| H | -6.18598 | -0.88896 | -0.67211 |
| C | -6.23657 | -2.63529 | 0.61878  |
| H | -5.8251  | -2.96031 | 1.57681  |
| H | -7.32646 | -2.67025 | 0.68454  |
| H | -5.91716 | -3.34104 | -0.15108 |
| C | 2.73136  | -1.32018 | 0.21435  |
| C | 2.94016  | -2.2761  | -0.96414 |
| C | 4.07164  | -0.7926  | 0.72271  |
| H | 2.25805  | -1.87529 | 1.03879  |
| C | 3.85427  | -3.43431 | -0.57143 |
| H | 3.3864   | -1.70742 | -1.78895 |
| H | 1.97534  | -2.64457 | -1.32523 |
| C | 5.0014   | -1.94158 | 1.10984  |
| H | 4.53863  | -0.1933  | -0.07084 |
| H | 3.90803  | -0.12795 | 1.57822  |
| C | 5.19459  | -2.92396 | -0.04468 |
| H | 4.0067   | -4.09694 | -1.4285  |
| H | 3.36461  | -4.03798 | 0.20394  |
| H | 5.96532  | -1.54195 | 1.43858  |

|   |         |          |         |
|---|---------|----------|---------|
| H | 4.57536 | -2.47159 | 1.97101 |
| H | 5.82232 | -3.76127 | 0.27542 |
| H | 5.73345 | -2.42285 | -0.8589 |
| C | 2.39037 | 5.2021   | 0.58643 |
| H | 3.00488 | 5.92981  | 0.04961 |
| H | 2.9528  | 4.26578  | 0.70747 |
| H | 2.14464 | 5.59662  | 1.57897 |
| O | 1.24373 | 5.0296   | -0.1964 |
| O | 0.39614 | 4.14589  | 0.54732 |

**[SRS9-01] \_TS(H4')**

|   |          |          |          |
|---|----------|----------|----------|
| N | 1.09022  | 0.00287  | -0.02838 |
| C | -0.18769 | -0.39475 | 0.00404  |
| C | -1.17829 | 0.4956   | 0.58     |
| C | -0.6658  | -1.62052 | -0.55145 |
| C | -2.54016 | 0.23637  | 0.36589  |
| C | -2.00697 | -1.87288 | -0.68728 |
| H | 0.04461  | -2.34812 | -0.92006 |
| C | -2.9633  | -0.92895 | -0.25836 |
| H | -3.28489 | 0.91948  | 0.75264  |
| H | -2.35658 | -2.79295 | -1.14127 |
| N | -0.78005 | 1.60884  | 1.27864  |
| C | -4.39388 | -1.2476  | -0.44839 |
| O | -5.13154 | -0.37194 | -0.04161 |
| H | 1.31327  | 1.1024   | -0.08246 |
| C | 2.13883  | -0.85405 | -0.57389 |
| C | 2.53566  | -1.92604 | 0.46702  |
| H | 1.75115  | -1.39021 | -1.45287 |
| C | 3.29967  | 0.01922  | -1.05412 |
| C | 3.40527  | -1.47672 | 1.65012  |
| H | 3.03197  | -2.75659 | -0.04811 |
| H | 1.60366  | -2.34676 | 0.85893  |
| H | 3.56902  | 0.7114   | -0.25186 |
| H | 2.93543  | 0.65654  | -1.86268 |
| C | 4.52438  | -0.79454 | -1.50142 |
| C | 4.9351   | -1.58472 | 1.49985  |
| H | 3.14058  | -0.45188 | 1.94009  |



|   |          |          |          |   |          |          |          |
|---|----------|----------|----------|---|----------|----------|----------|
| H | 5.76081  | 4.88776  | -0.45852 | O | -0.38053 | -1.46596 | 2.5685   |
| C | 5.55443  | 6.86243  | 0.37663  |   |          |          |          |
| C | 7.03669  | 7.07994  | 0.66133  |   |          |          |          |
| H | 4.95592  | 7.36243  | 1.14847  |   |          |          |          |
| H | 5.28881  | 7.34478  | -0.57247 | C | 2.74761  | -3.39341 | 1.13596  |
| H | 7.32231  | 6.64223  | 1.62318  | C | 3.57351  | -4.67309 | 1.01077  |
| H | 7.65961  | 6.61497  | -0.10955 | C | 2.71882  | -5.8345  | 0.50463  |
| H | 7.2877   | 8.14382  | 0.69329  | C | 2.02156  | -5.4759  | -0.80745 |
| C | 0.17163  | -0.6136  | -1.22259 | C | 1.21283  | -4.18483 | -0.68433 |
| C | 1.32861  | -1.26809 | -0.47193 | C | 2.08164  | -3.02575 | -0.19491 |
| H | 0.53677  | -0.17661 | -2.16492 | H | 3.33221  | -6.73238 | 0.37374  |
| H | -0.54511 | -1.38929 | -1.49509 | H | 4.4063   | -4.50529 | 0.31425  |
| C | 1.88234  | -2.46735 | -1.2385  | H | 4.0247   | -4.9223  | 1.97678  |
| H | 2.13583  | -0.55053 | -0.30392 | H | 1.95356  | -3.53097 | 1.88067  |
| H | 0.98691  | -1.5829  | 0.51521  | H | 3.36817  | -2.56602 | 1.49375  |
| H | 1.08815  | -3.21456 | -1.36702 | H | 2.77506  | -5.35623 | -1.59713 |
| H | 2.18197  | -2.16086 | -2.25088 | H | 1.36636  | -6.2927  | -1.12763 |
| C | 3.07253  | -3.11325 | -0.53441 | H | 0.75805  | -3.92496 | -1.64655 |
| C | 3.65737  | -4.30817 | -1.28293 | H | 0.39144  | -4.33126 | 0.03022  |
| H | 2.76433  | -3.4269  | 0.47093  | H | 2.86869  | -2.86503 | -0.95032 |
| H | 3.85793  | -2.35925 | -0.38921 | H | 1.96164  | -6.07978 | 1.26127  |
| C | 4.8504   | -4.94031 | -0.57144 | N | 1.25988  | -1.83236 | -0.07483 |
| H | 2.8761   | -5.0671  | -1.42427 | H | 0.33893  | -1.90369 | -0.49515 |
| H | 3.96094  | -3.9944  | -2.29104 | C | 1.7679   | -0.56108 | -0.08653 |
| H | 5.62656  | -4.17798 | -0.41924 | C | 0.9042   | 0.56283  | 0.0283   |
| H | 4.54352  | -5.26265 | 0.43262  | C | 3.15173  | -0.29793 | -0.17228 |
| C | 5.4536   | -6.12752 | -1.31811 | C | 1.42183  | 1.84941  | 0.04206  |
| C | 6.63696  | -6.75585 | -0.58996 | C | 3.65406  | 0.98979  | -0.14259 |
| H | 5.76915  | -5.80267 | -2.31769 | H | 3.84228  | -1.12689 | -0.25599 |
| H | 4.67708  | -6.88632 | -1.47775 | C | 2.79661  | 2.08698  | -0.03482 |
| H | 7.4405   | -6.02752 | -0.44029 | H | 0.741    | 2.68956  | 0.12531  |
| H | 6.34177  | -7.12689 | 0.39673  | H | 4.72182  | 1.16611  | -0.20684 |
| H | 7.05263  | -7.59798 | -1.15046 | N | -0.4924  | 0.43135  | 0.25735  |
| C | -0.5131  | -3.18774 | 4.04448  | H | -1.00913 | 1.26379  | 1.08102  |
| H | -0.05978 | -4.1574  | 4.2626   | C | 3.3743   | 3.44318  | -0.00724 |
| H | -1.59285 | -3.30184 | 3.89572  | O | 4.68464  | 3.71339  | -0.08199 |
| H | -0.33043 | -2.49097 | 4.86767  | O | 2.52715  | 4.31527  | 0.09369  |
| O | 0.11193  | -2.73044 | 2.86296  | C | -1.39301 | -0.26104 | -0.48528 |

**[SRS11-89] \_TS(H3')**

|                             |          |          |          |   |          |          |          |
|-----------------------------|----------|----------|----------|---|----------|----------|----------|
| O                           | -1.133   | -1.06019 | -1.37178 | H | -1.69367 | -6.33945 | -2.53925 |
| O                           | -2.64423 | 0.04104  | -0.08759 | H | -3.14375 | -4.37224 | -2.17844 |
| C                           | -3.69621 | -0.67412 | -0.76705 | H | -2.16943 | -4.11967 | -3.61822 |
| H                           | -3.57489 | -1.74252 | -0.57253 | H | -0.57503 | -2.70436 | -2.33745 |
| H                           | -3.59282 | -0.51077 | -1.8419  | H | -2.2127  | -2.07364 | -2.1992  |
| C                           | -5.00729 | -0.16311 | -0.24983 | H | -2.09235 | -5.73847 | -0.17541 |
| C                           | -5.62971 | 0.93028  | -0.85688 | H | -0.45497 | -6.34611 | -0.3504  |
| C                           | -5.61791 | -0.76394 | 0.8533   | H | -0.50816 | -4.29668 | 1.06683  |
| C                           | -6.83845 | 1.41826  | -0.36808 | H | 0.44483  | -4.02877 | -0.38962 |
| H                           | -5.16415 | 1.40093  | -1.71781 | H | -2.45136 | -3.19479 | 0.01287  |
| C                           | -6.827   | -0.27912 | 1.34494  | H | -0.26433 | -5.31584 | -2.59078 |
| H                           | -5.1429  | -1.61671 | 1.32939  | N | -0.85008 | -1.79515 | 0.13286  |
| C                           | -7.43871 | 0.81398  | 0.7348   | H | -0.50826 | -1.97616 | 1.32447  |
| H                           | -7.31347 | 2.26651  | -0.84954 | C | -1.55751 | -0.61838 | 0.02555  |
| H                           | -7.29279 | -0.75579 | 2.20098  | C | -0.8488  | 0.61334  | -0.10288 |
| H                           | -8.38249 | 1.19089  | 1.11464  | C | -2.97108 | -0.55738 | 0.01357  |
| C                           | 5.12471  | 5.02474  | -0.44476 | C | -1.55199 | 1.80699  | -0.23809 |
| H                           | 4.86179  | 5.71586  | 0.32863  | C | -3.65589 | 0.63394  | -0.11606 |
| H                           | 4.65477  | 5.31815  | -1.36017 | H | -3.5298  | -1.47927 | 0.12201  |
| C                           | 6.6534   | 5.01999  | -0.63103 | C | -2.94663 | 1.83293  | -0.24774 |
| H                           | 6.99493  | 6.01943  | -0.80239 | H | -1.00096 | 2.7344   | -0.34359 |
| H                           | 7.11885  | 4.63015  | 0.25004  | H | -4.73942 | 0.66307  | -0.11427 |
| H                           | 6.90855  | 4.40708  | -1.47016 | N | 0.54492  | 0.66859  | -0.27393 |
| C                           | -3.34772 | 3.40732  | 2.24083  | H | 0.88886  | 1.29261  | -0.98735 |
| H                           | -4.41244 | 3.25164  | 2.4117   | C | -3.71508 | 3.09438  | -0.38897 |
| H                           | -3.17715 | 3.99282  | 1.33675  | O | -5.04333 | 3.16163  | -0.37793 |
| H                           | -2.87754 | 3.88177  | 3.10288  | O | -3.00254 | 4.06372  | -0.51846 |
| O                           | -2.79177 | 2.09271  | 2.06386  | C | 1.50486  | 0.16439  | 0.56308  |
| O                           | -1.50349 | 2.14761  | 1.84742  | O | 1.32233  | -0.42071 | 1.60305  |
|                             |          |          |          | O | 2.72143  | 0.45421  | 0.04347  |
|                             |          |          |          | C | 3.8365   | 0.00068  | 0.83326  |
|                             |          |          |          | H | 3.84874  | -1.09246 | 0.81986  |
|                             |          |          |          | H | 3.69336  | 0.32282  | 1.86672  |
|                             |          |          |          | C | 5.08824  | 0.57553  | 0.23992  |
|                             |          |          |          | C | 5.64483  | 1.74677  | 0.75819  |
|                             |          |          |          | C | 5.71077  | -0.04646 | -0.84552 |
|                             |          |          |          | C | 6.80058  | 2.2898   | 0.2021   |
|                             |          |          |          | H | 5.17078  | 2.23448  | 1.60491  |
| <b>[SRS11-89] _TS (H4')</b> |          |          |          |   |          |          |          |
| C                           | -1.57059 | -2.91776 | -1.92831 |   |          |          |          |
| C                           | -2.11471 | -4.21404 | -2.52838 |   |          |          |          |
| C                           | -1.25928 | -5.41772 | -2.13728 |   |          |          |          |
| C                           | -1.11323 | -5.51365 | -0.61984 |   |          |          |          |
| C                           | -0.57181 | -4.21555 | -0.0217  |   |          |          |          |
| C                           | -1.44437 | -3.01784 | -0.40011 |   |          |          |          |

|   |          |          |          |   |          |          |          |
|---|----------|----------|----------|---|----------|----------|----------|
| C | 6.86427  | 0.49442  | -1.40618 | H | 1.98183  | -6.11476 | 1.22787  |
| H | 5.28736  | -0.96014 | -1.25215 | N | 1.28008  | -1.86734 | -0.10822 |
| C | 7.41137  | 1.66465  | -0.88254 | H | 0.35912  | -1.93867 | -0.52854 |
| H | 7.2253   | 3.19791  | 0.61701  | C | 1.78809  | -0.59606 | -0.11992 |
| H | 7.33933  | 0.00104  | -2.24768 | C | 0.92439  | 0.52785  | -0.00509 |
| H | 8.31331  | 2.08454  | -1.31546 | C | 3.17193  | -0.33291 | -0.20567 |
| C | -2.39211 | -1.56096 | 3.73658  | C | 1.44202  | 1.81443  | 0.00867  |
| H | -2.70224 | -0.65919 | 4.26795  | C | 3.67426  | 0.95481  | -0.17599 |
| H | -2.25545 | -2.38527 | 4.44253  | H | 3.86247  | -1.16187 | -0.28939 |
| H | -3.14203 | -1.83178 | 2.98754  | C | 2.8168   | 2.052    | -0.06822 |
| O | -1.16107 | -1.22638 | 3.12235  | H | 0.76119  | 2.65458  | 0.09192  |
| O | -0.69661 | -2.33753 | 2.45152  | H | 4.74202  | 1.13113  | -0.24023 |
| C | -5.45028 | 4.51439  | -0.1558  | N | -0.47221 | 0.39637  | 0.22396  |
| H | -5.16107 | 5.11577  | -0.99222 | H | -0.9263  | 1.2653   | 1.01538  |
| H | -4.981   | 4.88704  | 0.73066  | C | 3.39449  | 3.4082   | -0.04063 |
| C | -6.98019 | 4.56934  | 0.0114   | O | 4.70484  | 3.67841  | -0.11538 |
| H | -7.29219 | 5.58839  | 0.10674  | O | 2.54734  | 4.28029  | 0.06029  |
| H | -7.44855 | 4.13159  | -0.84528 | C | -1.37281 | -0.29602 | -0.51867 |
| H | -7.26281 | 4.02621  | 0.88892  | O | -1.11281 | -1.09517 | -1.40518 |

**[SRS11-97] \_TS (H3')**

|   |         |          |          |   |          |          |          |
|---|---------|----------|----------|---|----------|----------|----------|
| C | 2.7678  | -3.42839 | 1.10256  | H | -3.59979 | -0.53936 | -1.85414 |
| C | 3.59371 | -4.70807 | 0.97738  | C | 5.14491  | 4.98976  | -0.47815 |
| C | 2.73901 | -5.86948 | 0.47123  | H | 4.88199  | 5.68088  | 0.29524  |
| C | 2.04176 | -5.51088 | -0.84085 | H | 4.67497  | 5.28317  | -1.39356 |
| C | 1.23303 | -4.21981 | -0.71773 | C | 6.67359  | 4.98501  | -0.66442 |
| C | 2.10183 | -3.06073 | -0.2283  | H | 7.01513  | 5.98445  | -0.83578 |
| H | 3.3524  | -6.76736 | 0.34035  | H | 7.13904  | 4.59517  | 0.21664  |
| H | 4.4265  | -4.54027 | 0.28085  | H | 6.92874  | 4.3721   | -1.50356 |
| H | 4.04489 | -4.95728 | 1.94339  | H | -4.62617 | -0.36252 | -0.45116 |
| H | 1.97375 | -3.56595 | 1.84727  | C | -2.97853 | 3.52368  | 1.04266  |
| H | 3.38836 | -2.60099 | 1.46035  | H | -4.03778 | 3.63607  | 0.94135  |
| H | 2.79526 | -5.3912  | -1.63052 | H | -2.52442 | 3.53467  | 0.07387  |
| H | 1.38655 | -6.32767 | -1.16103 | H | -2.58874 | 4.3298   | 1.62844  |
| H | 0.77824 | -3.95994 | -1.67994 | O | -2.69073 | 2.28146  | 1.68993  |
| H | 0.41163 | -4.36623 | -0.00317 | O | -1.384   | 2.14114  | 1.81308  |
| H | 2.88888 | -2.90001 | -0.98372 |   |          |          |          |

**[SRS11-97] \_TS (H4')**

|   |          |          |          |
|---|----------|----------|----------|
| C | -1.57059 | -2.91776 | -1.92831 |
| C | -2.11471 | -4.21404 | -2.52838 |
| C | -1.25928 | -5.41772 | -2.13728 |
| C | -1.11323 | -5.51365 | -0.61984 |
| C | -0.57181 | -4.21555 | -0.0217  |
| C | -1.44437 | -3.01784 | -0.40011 |
| H | -1.69367 | -6.33945 | -2.53925 |
| H | -3.14375 | -4.37224 | -2.17844 |
| H | -2.16943 | -4.11967 | -3.61822 |
| H | -0.57503 | -2.70436 | -2.33745 |
| H | -2.2127  | -2.07364 | -2.1992  |
| H | -2.09235 | -5.73847 | -0.17541 |
| H | -0.45497 | -6.34611 | -0.3504  |
| H | -0.50816 | -4.29668 | 1.06683  |
| H | 0.44483  | -4.02877 | -0.38962 |
| H | -2.45136 | -3.19479 | 0.01287  |
| H | -0.26433 | -5.31584 | -2.59078 |
| N | -0.85008 | -1.79515 | 0.13286  |
| H | -0.50826 | -1.97616 | 1.32447  |
| C | -1.55751 | -0.61838 | 0.02555  |
| C | -0.8488  | 0.61334  | -0.10288 |
| C | -2.97108 | -0.55738 | 0.01357  |
| C | -1.55199 | 1.80699  | -0.23809 |
| C | -3.65589 | 0.63394  | -0.11606 |
| H | -3.5298  | -1.47927 | 0.12201  |
| C | -2.94663 | 1.83293  | -0.24774 |
| H | -1.00096 | 2.7344   | -0.34359 |
| H | -4.73942 | 0.66307  | -0.11427 |
| N | 0.54492  | 0.66859  | -0.27393 |
| H | 0.88886  | 1.29261  | -0.98735 |
| C | -3.71508 | 3.09438  | -0.38897 |
| O | -5.04333 | 3.16163  | -0.37793 |
| O | -3.00254 | 4.06372  | -0.51846 |
| C | 1.50486  | 0.16439  | 0.56308  |
| O | 1.32233  | -0.42071 | 1.60305  |
| O | 2.72143  | 0.45421  | 0.04347  |

|   |          |          |          |
|---|----------|----------|----------|
| C | 3.8365   | 0.00068  | 0.83326  |
| H | 3.87805  | -1.06828 | 0.81092  |
| H | 3.71614  | 0.3319   | 1.84356  |
| C | -2.39211 | -1.56096 | 3.73658  |
| H | -2.70224 | -0.65919 | 4.26795  |
| H | -2.25545 | -2.38527 | 4.44253  |
| H | -3.14203 | -1.83178 | 2.98754  |
| O | -1.16107 | -1.22638 | 3.12235  |
| O | -0.69661 | -2.33753 | 2.45152  |
| C | -5.45028 | 4.51439  | -0.1558  |
| H | -5.16107 | 5.11577  | -0.99222 |
| H | -4.981   | 4.88704  | 0.73066  |
| C | -6.98019 | 4.56934  | 0.0114   |
| H | -7.29219 | 5.58839  | 0.10674  |
| H | -7.44855 | 4.13159  | -0.84528 |
| H | -7.26281 | 4.02621  | 0.88892  |
| H | 4.744    | 0.40135  | 0.43227  |

**[SRS11-98]\_TS (H3')**

|   |         |          |          |
|---|---------|----------|----------|
| C | 2.74761 | -3.39341 | 1.13596  |
| C | 3.57351 | -4.67309 | 1.01077  |
| C | 2.71882 | -5.8345  | 0.50463  |
| C | 2.02156 | -5.4759  | -0.80745 |
| C | 1.21283 | -4.18483 | -0.68433 |
| C | 2.08164 | -3.02575 | -0.19491 |
| H | 3.33221 | -6.73238 | 0.37374  |
| H | 4.4063  | -4.50529 | 0.31425  |
| H | 4.0247  | -4.9223  | 1.97678  |
| H | 1.95356 | -3.53097 | 1.88067  |
| H | 3.36817 | -2.56602 | 1.49375  |
| H | 2.77506 | -5.35623 | -1.59713 |
| H | 1.36636 | -6.2927  | -1.12763 |
| H | 0.75805 | -3.92496 | -1.64655 |
| H | 0.39144 | -4.33126 | 0.03022  |
| H | 2.86869 | -2.86503 | -0.95032 |
| H | 1.96164 | -6.07978 | 1.26127  |
| N | 1.25988 | -1.83236 | -0.07483 |



|   |          |          |          |   |          |          |          |
|---|----------|----------|----------|---|----------|----------|----------|
| O | -1.16107 | -1.22638 | 3.12235  | C | 7.58120  | -2.36598 | -0.13181 |
| O | -0.69661 | -2.33753 | 2.45152  | H | 8.66377  | -2.22886 | -0.06827 |
| C | -5.45028 | 4.51439  | -0.1558  | H | 7.26408  | -2.97880 | 0.71525  |
| H | -5.16107 | 5.11577  | -0.99222 | H | 7.35903  | -2.90829 | -1.05392 |
| H | -4.981   | 4.88704  | 0.73066  | C | 1.37662  | 4.54354  | 1.59083  |
| C | -6.98019 | 4.56934  | 0.0114   | H | 1.11499  | 5.56343  | 1.87931  |
| H | -7.29219 | 5.58839  | 0.10674  | H | 1.29240  | 4.42968  | 0.50513  |
| H | -7.44855 | 4.13159  | -0.84528 | H | 2.39331  | 4.30459  | 1.91535  |
| H | -7.26281 | 4.02621  | 0.88892  | O | 0.44157  | 3.71156  | 2.25396  |
| C | 2.88828  | 0.49396  | -0.02779 | O | 0.76159  | 2.39180  | 2.03233  |
| H | 3.09707  | 1.53409  | 0.11161  | C | -1.45244 | -2.55033 | -0.68993 |
| H | 3.63594  | -0.08944 | 0.46774  | C | -2.79878 | -2.42165 | -1.42048 |
| H | 2.89304  | 0.2662   | -1.07326 | H | -0.81733 | -3.18051 | -1.32826 |

**[SRS8-91]\_TS (H3')**

|   |          |          |          |   |          |          |          |
|---|----------|----------|----------|---|----------|----------|----------|
| N | -0.83890 | -1.23113 | -0.59564 | C | -1.54207 | -3.19167 | 0.70139  |
| H | -1.39652 | -0.42792 | -0.89810 | C | -3.99631 | -1.86141 | -0.63800 |
| C | 0.48057  | -0.98525 | -0.48327 | H | -3.06914 | -3.40255 | -1.82396 |
| C | 0.96842  | 0.37097  | -0.35451 | H | -2.61689 | -1.79163 | -2.29803 |
| C | 1.43577  | -2.03615 | -0.47741 | H | -2.02453 | -2.46871 | 1.36474  |
| C | 2.35944  | 0.57146  | -0.27224 | H | -0.52971 | -3.31488 | 1.09672  |
| C | 2.78435  | -1.79178 | -0.38447 | C | -2.30246 | -4.52702 | 0.71131  |
| H | 1.09241  | -3.05935 | -0.55352 | C | -4.89893 | -2.86570 | 0.10474  |
| C | 3.26775  | -0.47045 | -0.28771 | H | -3.66927 | -1.08212 | 0.06228  |
| H | 2.72471  | 1.58723  | -0.17972 | H | -4.63008 | -1.34444 | -1.36613 |
| H | 3.48546  | -2.61733 | -0.39217 | C | -3.54320 | -4.53334 | 1.61063  |
| N | 0.21651  | 1.50972  | -0.16866 | H | -2.60378 | -4.78812 | -0.30866 |
| H | 0.51169  | 2.10290  | 0.89732  | H | -1.63985 | -5.33842 | 1.02921  |
| C | 4.70857  | -0.14820 | -0.20035 | C | -4.46712 | -3.31350 | 1.50922  |
| O | 5.48155  | -1.24998 | -0.19880 | H | -5.87761 | -2.38422 | 0.20851  |
| O | 5.16076  | 0.97700  | -0.13796 | H | -5.07140 | -3.74257 | -0.53426 |
| C | -0.99984 | 1.82290  | -0.68779 | H | -3.22864 | -4.62660 | 2.65742  |
| O | -1.62635 | 1.17684  | -1.53076 | H | -4.12237 | -5.43832 | 1.39016  |
| O | -1.40397 | 2.99641  | -0.19030 | H | -4.01771 | -2.45617 | 2.02520  |
| C | 6.89666  | -1.02004 | -0.11472 | H | -5.36714 | -3.55050 | 2.08788  |
| H | 7.10704  | -0.46394 | 0.80277  | C | -2.70034 | 3.57770  | -0.53492 |
| H | 7.20088  | -0.39358 | -0.95754 | C | -2.74998 | 3.90650  | -2.02330 |
|   |          |          |          | C | -3.82835 | 2.64367  | -0.10949 |
|   |          |          |          | C | -2.72217 | 4.85250  | 0.29937  |
|   |          |          |          | H | -1.90636 | 4.54471  | -2.29927 |



|   |          |         |          |   |          |          |          |
|---|----------|---------|----------|---|----------|----------|----------|
| H | -2.72298 | 3.00185 | -2.63008 | H | -2.76117 | -3.08402 | 0.54829  |
| H | -3.67259 | 4.45121 | -2.24231 | N | -0.20603 | 1.36263  | -0.74026 |
| H | -3.71969 | 2.37477 | 0.94457  | H | -0.59652 | 1.79470  | -1.56284 |
| H | -4.78629 | 3.15645 | -0.23163 | C | -4.40103 | -1.09684 | -0.07979 |
| H | -3.84304 | 1.73587 | -0.71220 | O | -5.04133 | -2.09583 | 0.17611  |
| H | -3.66445 | 5.38310 | 0.14196  | O | -4.96587 | 0.06846  | -0.43430 |
| H | -2.62044 | 4.61873 | 1.36116  | C | -6.40235 | 0.07776  | -0.49101 |
| H | -1.90070 | 5.51330 | 0.01282  | H | -6.72852 | -0.68009 | -1.20822 |

**[SRS8-91]\_TS (H4')**

|   |          |          |          |
|---|----------|----------|----------|
| C | 1.78419  | -2.49964 | -1.73381 |
| C | 2.62108  | -3.70605 | -2.15840 |
| C | 4.10938  | -3.47847 | -1.89993 |
| C | 4.35911  | -3.10399 | -0.44042 |
| C | 3.52137  | -1.89834 | -0.01723 |
| C | 2.03025  | -2.13585 | -0.26100 |
| H | 4.68284  | -4.37186 | -2.16997 |
| H | 2.28863  | -4.59319 | -1.60247 |
| H | 2.44403  | -3.92083 | -3.21774 |
| H | 2.04549  | -1.62759 | -2.34644 |
| H | 0.72033  | -2.69672 | -1.89982 |
| H | 4.11377  | -3.96152 | 0.20088  |
| H | 5.42052  | -2.89112 | -0.27607 |
| H | 3.68972  | -1.67116 | 1.03896  |
| H | 3.82497  | -1.01216 | -0.58876 |
| H | 1.72300  | -2.99598 | 0.35690  |
| H | 4.46805  | -2.66741 | -2.54765 |
| N | 1.28478  | -0.92901 | 0.08598  |
| H | 1.68383  | -0.48604 | 1.18527  |
| C | -0.09239 | -0.97890 | 0.07103  |
| C | -0.82962 | 0.19227  | -0.27727 |
| C | -0.83096 | -2.14943 | 0.36218  |
| C | -2.21992 | 0.14520  | -0.32674 |
| C | -2.21017 | -2.18050 | 0.31384  |
| H | -0.29123 | -3.04606 | 0.64296  |
| C | -2.91953 | -1.02663 | -0.03721 |
| H | -2.76737 | 1.03987  | -0.59996 |

|   |          |          |          |
|---|----------|----------|----------|
| H | -2.76117 | -3.08402 | 0.54829  |
| N | -0.20603 | 1.36263  | -0.74026 |
| H | -0.59652 | 1.79470  | -1.56284 |
| C | -4.40103 | -1.09684 | -0.07979 |
| O | -5.04133 | -2.09583 | 0.17611  |
| O | -4.96587 | 0.06846  | -0.43430 |
| C | -6.40235 | 0.07776  | -0.49101 |
| H | -6.72852 | -0.68009 | -1.20822 |
| H | -6.79226 | -0.20524 | 0.49022  |
| C | -6.83487 | 1.46674  | -0.89547 |
| H | -7.92563 | 1.51049  | -0.94984 |
| H | -6.49888 | 2.21011  | -0.16888 |
| H | -6.43306 | 1.73349  | -1.87572 |
| C | 0.72983  | 2.11258  | -0.07045 |
| O | 1.14422  | 1.88047  | 1.04062  |
| O | 1.07819  | 3.14979  | -0.85935 |
| C | 2.03567  | 4.15139  | -0.38993 |
| C | 0.61434  | -1.41873 | 3.92911  |
| H | -0.28640 | -1.15473 | 4.48656  |
| H | 1.45687  | -1.54738 | 4.61488  |
| H | 0.44926  | -2.34169 | 3.36515  |
| O | 0.84659  | -0.32692 | 3.05852  |
| O | 1.99507  | -0.58442 | 2.33987  |
| C | 2.11408  | 5.11374  | -1.56833 |
| H | 1.13464  | 5.55211  | -1.77517 |
| H | 2.81460  | 5.92192  | -1.34417 |
| H | 2.45890  | 4.59561  | -2.46647 |
| C | 1.49359  | 4.85785  | 0.84806  |
| H | 0.50311  | 5.27482  | 0.64585  |
| H | 1.42609  | 4.17498  | 1.69452  |
| H | 2.15994  | 5.68276  | 1.11515  |
| C | 3.38994  | 3.49894  | -0.13509 |
| H | 3.33787  | 2.79450  | 0.69468  |
| H | 3.73138  | 2.97105  | -1.02961 |
| H | 4.12511  | 4.27216  | 0.10489  |

**[SRS8-24]\_TS (H4')**

|   |          |          |          |   |          |          |          |
|---|----------|----------|----------|---|----------|----------|----------|
| C | -3.02950 | -1.69093 | 1.00011  | N | 0.40944  | 1.86360  | 1.14168  |
| C | -4.20990 | -2.63374 | 0.76953  | O | 1.31194  | 2.68928  | 1.09189  |
| C | -5.49726 | -1.86099 | 0.48987  | O | -0.62303 | 2.01167  | 1.77661  |
| C | -5.30978 | -0.88922 | -0.67310 | C | -1.04629 | 4.03234  | -0.69311 |
| C | -4.12690 | 0.05110  | -0.44348 | H | -0.08141 | 4.53859  | -0.74260 |
| C | -2.83814 | -0.73615 | -0.19326 | H | -1.33483 | 3.86797  | 0.34914  |
| H | -6.31797 | -2.55453 | 0.27895  | H | -1.81302 | 4.61476  | -1.21059 |
| H | -3.98958 | -3.29379 | -0.08025 | O | -0.85216 | 2.79423  | -1.36366 |
| H | -4.33260 | -3.28253 | 1.64302  | O | -2.03995 | 2.08333  | -1.34164 |
| H | -3.20327 | -1.07985 | 1.89353  |   |          |          |          |
| H | -2.11301 | -2.26067 | 1.18266  |   |          |          |          |
| H | -5.14849 | -1.45712 | -1.59933 |   |          |          |          |
| H | -6.21874 | -0.29966 | -0.82910 | C | 2.49258  | -1.09954 | 0.39787  |
| H | -3.99809 | 0.71259  | -1.30427 | C | 3.14772  | 0.05795  | -0.05119 |
| H | -4.31873 | 0.68978  | 0.42744  | C | 2.39461  | 1.15928  | -0.44222 |
| H | -2.63163 | -1.33267 | -1.09566 | C | 0.99358  | 1.14300  | -0.42198 |
| H | -5.78350 | -1.29979 | 1.38892  | C | 0.31828  | -0.03426 | 0.07726  |
| N | -1.74386 | 0.17907  | 0.10026  | C | 1.11417  | -1.13802 | 0.45847  |
| H | -1.92074 | 1.28455  | -0.45115 | H | 3.07266  | -1.96180 | 0.70185  |
| C | -0.45853 | -0.24470 | 0.02261  | H | 2.92660  | 2.03587  | -0.78910 |
| C | 0.62284  | 0.59483  | 0.44139  | H | 0.63207  | -2.03932 | 0.81319  |
| C | -0.08112 | -1.51451 | -0.49694 | N | 0.26574  | 2.18472  | -0.91870 |
| C | 1.94697  | 0.21977  | 0.29284  | H | -0.70969 | 2.30761  | -0.60272 |
| C | 1.23678  | -1.89719 | -0.61535 | N | -1.03170 | -0.05360 | 0.16760  |
| H | -0.85362 | -2.19156 | -0.83482 | H | -1.55570 | 0.81223  | 0.00855  |
| C | 2.26934  | -1.02984 | -0.23342 | C | 4.61905  | 0.16493  | -0.13125 |
| H | 2.72243  | 0.90228  | 0.61296  | O | 5.21897  | 1.14836  | -0.52043 |
| H | 1.49861  | -2.86732 | -1.02243 | O | 5.24406  | -0.95496 | 0.27852  |
| C | 3.67277  | -1.48894 | -0.39436 | C | 6.67790  | -0.92412 | 0.22926  |
| O | 3.97485  | -2.57617 | -0.84062 | H | 6.99043  | -0.73603 | -0.80158 |
| O | 4.56207  | -0.57346 | 0.00562  | H | 7.03322  | -0.08888 | 0.83881  |
| C | 5.94866  | -0.94137 | -0.12250 | C | 7.18171  | -2.25319 | 0.74026  |
| H | 6.11806  | -1.85786 | 0.44847  | H | 6.81537  | -3.07603 | 0.12188  |
| H | 6.15196  | -1.16130 | -1.17369 | H | 8.27447  | -2.26709 | 0.71611  |
| C | 6.77633  | 0.21203  | 0.38983  | H | 6.85991  | -2.42488 | 1.77010  |
| H | 7.83780  | -0.03357 | 0.30391  | C | -3.13819 | 4.15267  | 1.15810  |
| H | 6.58715  | 1.11929  | -0.18815 | H | -3.48393 | 4.33284  | 2.17767  |
| H | 6.55687  | 0.41782  | 1.43987  | H | -3.95284 | 4.30725  | 0.44506  |

**[SRS9-14] \_TS**

|   |          |          |          |   |          |          |          |
|---|----------|----------|----------|---|----------|----------|----------|
| H | -2.30303 | 4.81784  | 0.91715  | C | 2.22321  | -0.93196 | -0.42021 |
| O | -2.71254 | 2.80249  | 1.12940  | H | 5.26499  | -3.32754 | 0.37164  |
| O | -2.29137 | 2.49314  | -0.13235 | H | 3.84542  | -2.88745 | -1.60307 |
| C | -1.82713 | -1.19599 | 0.59848  | H | 5.29835  | -1.90660 | -1.69874 |
| C | -1.97110 | -2.22300 | -0.54289 | H | 4.06667  | 0.08235  | -0.85948 |
| H | -1.29224 | -1.69632 | 1.41682  | H | 3.25886  | -0.57336 | -2.27576 |
| C | -3.14306 | -0.66302 | 1.17275  | H | 2.82959  | -3.39766 | 0.78294  |
| C | -2.89637 | -1.85672 | -1.71051 | H | 3.64081  | -2.73607 | 2.19338  |
| H | -2.28067 | -3.18643 | -0.12176 | H | 1.61029  | -1.39589 | 1.60933  |
| H | -0.96286 | -2.38930 | -0.93651 | H | 3.06909  | -0.42104 | 1.48795  |
| H | -3.56379 | 0.05754  | 0.46505  | H | 1.64703  | -1.76336 | -0.84826 |
| H | -2.90556 | -0.08077 | 2.06738  | H | 5.31292  | -1.61250 | 0.75807  |
| C | -4.17266 | -1.75996 | 1.48527  | N | 1.44184  | 0.28342  | -0.52541 |
| C | -4.37245 | -2.28404 | -1.61568 | H | 1.98496  | 1.32440  | -0.23948 |
| H | -2.83753 | -0.77881 | -1.90941 | C | 0.09547  | 0.29797  | -0.38818 |
| H | -2.48423 | -2.33725 | -2.60444 | C | -0.71046 | -0.85684 | -0.19276 |
| C | -5.47142 | -1.65129 | 0.67828  | C | -0.55560 | 1.56284  | -0.46706 |
| H | -3.72939 | -2.74640 | 1.31556  | C | -2.08316 | -0.74522 | -0.09360 |
| H | -4.42714 | -1.74154 | 2.54980  | C | -1.92516 | 1.65883  | -0.35050 |
| C | -5.32522 | -1.37792 | -0.82273 | H | 0.05434  | 2.44624  | -0.62016 |
| H | -4.75016 | -2.32816 | -2.64339 | C | -2.70899 | 0.50896  | -0.16842 |
| H | -4.43119 | -3.31442 | -1.23843 | H | -2.68901 | -1.63168 | 0.05024  |
| H | -6.09017 | -0.85083 | 1.10292  | H | -2.42171 | 2.62067  | -0.40822 |
| H | -6.04223 | -2.57768 | 0.81815  | C | -4.17796 | 0.67125  | -0.06584 |
| H | -5.03196 | -0.33414 | -0.98806 | O | -4.75203 | 1.73902  | -0.13321 |
| H | -6.32753 | -1.46373 | -1.25822 | O | -4.81677 | -0.49742 | 0.11235  |
| C | 0.89408  | 3.40444  | -1.36575 | C | -6.24761 | -0.41850 | 0.22325  |
| H | 1.48892  | 3.89111  | -0.58135 | H | -6.49757 | 0.23659  | 1.06197  |
| H | 1.55006  | 3.20926  | -2.21959 | H | -6.64370 | 0.04220  | -0.68562 |
| H | 0.11046  | 4.09101  | -1.68573 | C | -6.76910 | -1.82141 | 0.42258  |
|   |          |          |          | H | -7.85828 | -1.79914 | 0.51100  |
|   |          |          |          | H | -6.50792 | -2.46166 | -0.42323 |
|   |          |          |          | H | -6.36147 | -2.26650 | 1.33322  |
|   |          |          |          | H | -0.25380 | -1.83544 | -0.11688 |
| C | 3.51294  | -0.78672 | -1.23254 | C | 4.47557  | 2.97378  | 0.99646  |
| C | 4.37219  | -2.04629 | -1.13187 | H | 5.49296  | 3.10281  | 0.62026  |
| C | 4.68475  | -2.40011 | 0.32162  | H | 4.46345  | 2.24569  | 1.81487  |
| C | 3.40363  | -2.53321 | 1.14364  | H | 4.08244  | 3.93067  | 1.35364  |
| C | 2.54189  | -1.27491 | 1.04682  |   |          |          |          |

**[Compound 1] \_TS**

|                         |          |          |          |                         |          |          |          |
|-------------------------|----------|----------|----------|-------------------------|----------|----------|----------|
| O                       | 3.72029  | 2.50826  | -0.10001 | H                       | 4.50805  | -0.62915 | -0.57279 |
| O                       | 2.40212  | 2.35634  | 0.32685  | H                       | 4.28311  | -1.85261 | -1.84352 |
|                         |          |          |          | H                       | 2.95875  | -1.31220 | 1.62110  |
| <b>[Compound 2] _TS</b> |          |          |          | H                       | 2.08740  | -2.82821 | 1.27792  |
|                         |          |          |          | H                       | 5.01550  | -2.56388 | 0.93684  |
| N                       | 1.89328  | -0.17519 | -0.58823 | H                       | 4.04030  | -3.63647 | -0.08571 |
| H                       | 2.55223  | 0.78320  | -0.25510 |                         |          |          |          |
| C                       | 0.55669  | -0.00963 | -0.43257 | <b>[Compound 3] _TS</b> |          |          |          |
| C                       | -0.36028 | -1.07453 | -0.22761 | N                       | -2.23175 | 0.71979  | -0.27801 |
| C                       | 0.04520  | 1.31643  | -0.49814 | H                       | -2.96882 | -0.20349 | -0.00014 |
| C                       | -1.71287 | -0.82066 | -0.11167 | C                       | -0.91597 | 0.41410  | -0.20379 |
| C                       | -1.30605 | 1.55511  | -0.36531 | C                       | 0.11256  | 1.37494  | -0.00849 |
| H                       | 0.74381  | 2.13074  | -0.65446 | C                       | -0.54331 | -0.95193 | -0.35500 |
| C                       | -2.20316 | 0.49288  | -0.17716 | C                       | 1.43698  | 0.98505  | 0.02273  |
| H                       | -2.40714 | -1.63816 | 0.04043  | C                       | 0.78219  | -1.32634 | -0.30301 |
| H                       | -1.70022 | 2.56369  | -0.41376 | H                       | -1.32709 | -1.68563 | -0.50500 |
| C                       | -3.64605 | 0.80896  | -0.05428 | C                       | 1.78920  | -0.36645 | -0.11966 |
| O                       | -4.10513 | 1.93119  | -0.11557 | H                       | 2.21676  | 1.72374  | 0.16354  |
| O                       | -4.40136 | -0.28577 | 0.13524  | H                       | 1.07104  | -2.36528 | -0.41311 |
| C                       | -5.81442 | -0.05742 | 0.26681  | C                       | 3.19735  | -0.82747 | -0.08861 |
| H                       | -5.98143 | 0.62994  | 1.10025  | O                       | 3.53772  | -1.98576 | -0.21705 |
| H                       | -6.17541 | 0.43089  | -0.64226 | O                       | 4.06768  | 0.17863  | 0.09905  |
| C                       | -6.47439 | -1.39654 | 0.49313  | C                       | 5.45537  | -0.19401 | 0.14143  |
| H                       | -7.55394 | -1.26123 | 0.59729  | H                       | 5.59546  | -0.92940 | 0.93805  |
| H                       | -6.29390 | -2.07077 | -0.34730 | H                       | 5.71605  | -0.67694 | -0.80413 |
| H                       | -6.09979 | -1.86961 | 1.40381  | C                       | 6.25964  | 1.06155  | 0.37900  |
| H                       | -0.00141 | -2.09343 | -0.15289 | H                       | 7.32358  | 0.81409  | 0.41696  |
| C                       | 5.25672  | 2.06910  | 0.91795  | H                       | 6.10587  | 1.78546  | -0.42465 |
| H                       | 6.24909  | 2.16028  | 0.47085  | H                       | 5.98417  | 1.53110  | 1.32615  |
| H                       | 5.24037  | 1.24601  | 1.64066  | H                       | -0.13632 | 2.42200  | 0.11137  |
| H                       | 4.98239  | 3.00177  | 1.42003  | C                       | -5.86702 | -1.38550 | 0.53280  |
| O                       | 4.37833  | 1.81074  | -0.15593 | H                       | -6.72685 | -1.45717 | -0.13674 |
| O                       | 3.08783  | 1.72362  | 0.36062  | H                       | -5.98961 | -0.53867 | 1.21667  |
| C                       | 2.50026  | -1.47136 | -0.51123 | H                       | -5.76003 | -2.30855 | 1.11062  |
| C                       | 4.00464  | -1.56435 | -0.82747 | O                       | -4.74774 | -1.19653 | -0.30482 |
| C                       | 2.80198  | -2.10216 | 0.88246  | O                       | -3.61321 | -1.13758 | 0.49858  |
| H                       | 1.93382  | -2.17924 | -1.12753 | C                       | -2.68875 | 2.07624  | -0.07168 |
| C                       | 4.13309  | -2.61644 | 0.29655  |                         |          |          |          |

|   |          |         |          |
|---|----------|---------|----------|
| H | -2.24285 | 2.71362 | -0.84766 |
| H | -2.32848 | 2.46247 | 0.89335  |
| C | -4.20296 | 2.17340 | -0.13526 |
| H | -4.66429 | 1.60015 | 0.67151  |
| H | -4.57982 | 1.78650 | -1.08431 |
| H | -4.51380 | 3.21600 | -0.03538 |

**[Compound 4] \_TS**

|   |          |          |          |
|---|----------|----------|----------|
| N | -2.17662 | 0.33004  | -0.37083 |
| H | -2.86863 | -0.64991 | -0.18483 |
| C | -0.84443 | 0.12825  | -0.26480 |
| C | 0.13736  | 1.13186  | -0.03625 |
| C | -0.39174 | -1.21384 | -0.43450 |
| C | 1.47869  | 0.80614  | 0.01187  |
| C | 0.94772  | -1.52620 | -0.36311 |
| H | -1.13195 | -1.98514 | -0.61717 |
| C | 1.90324  | -0.52202 | -0.14324 |
| H | 2.21648  | 1.58219  | 0.17639  |
| H | 1.28787  | -2.54816 | -0.48525 |
| C | 3.33159  | -0.91196 | -0.08921 |
| O | 3.73268  | -2.04963 | -0.22667 |
| O | 4.14539  | 0.13404  | 0.13141  |
| C | 5.54917  | -0.16729 | 0.20057  |
| H | 5.70981  | -0.90401 | 0.99208  |
| H | 5.85539  | -0.62440 | -0.74411 |
| C | 6.28134  | 1.12547  | 0.47020  |
| H | 7.35560  | 0.93345  | 0.53090  |
| H | 6.10836  | 1.84964  | -0.32930 |
| H | 5.95950  | 1.56891  | 1.41531  |
| H | -0.15600 | 2.16401  | 0.08933  |
| C | -5.77741 | -1.49311 | 0.72872  |
| H | -6.74370 | -1.30511 | 0.25541  |
| H | -5.61935 | -0.79412 | 1.55739  |
| H | -5.73592 | -2.52013 | 1.10400  |
| O | -4.81384 | -1.29871 | -0.28332 |
| O | -3.55844 | -1.56408 | 0.26679  |
| C | -2.87975 | 1.58684  | -0.13905 |

|   |          |         |          |
|---|----------|---------|----------|
| C | -2.68984 | 2.16999 | 1.26549  |
| C | -2.61923 | 2.60242 | -1.25697 |
| H | -2.86653 | 1.40215 | 2.02223  |
| H | -1.69435 | 2.58599 | 1.42914  |
| H | -3.41461 | 2.97398 | 1.42099  |
| H | -2.79714 | 2.14810 | -2.23401 |
| H | -3.30288 | 3.44778 | -1.14254 |
| H | -1.59920 | 2.99157 | -1.24339 |
| H | -3.93309 | 1.30064 | -0.22084 |

**[Compound 5] \_TS**

|   |          |          |          |
|---|----------|----------|----------|
| N | 1.64840  | -0.04676 | -0.28727 |
| H | 2.22691  | 0.98843  | -0.03059 |
| C | 0.30051  | 0.04962  | -0.21228 |
| C | -0.56210 | -1.05434 | 0.02467  |
| C | -0.28462 | 1.33306  | -0.40655 |
| C | -1.93153 | -0.87845 | 0.05293  |
| C | -1.65264 | 1.49439  | -0.35689 |
| H | 0.37233  | 2.17610  | -0.58778 |
| C | -2.49428 | 0.39405  | -0.13344 |
| H | -2.58366 | -1.72595 | 0.22615  |
| H | -2.10273 | 2.47014  | -0.49935 |
| C | -3.95752 | 0.62734  | -0.10492 |
| O | -4.47730 | 1.71358  | -0.25953 |
| O | -4.65727 | -0.49868 | 0.11306  |
| C | -6.08613 | -0.34928 | 0.15891  |
| H | -6.33796 | 0.35837  | 0.95323  |
| H | -6.42312 | 0.08203  | -0.78736 |
| C | -6.68100 | -1.71511 | 0.40491  |
| H | -7.77051 | -1.63899 | 0.44697  |
| H | -6.41746 | -2.40860 | -0.39704 |
| H | -6.33068 | -2.13143 | 1.35226  |
| H | -0.14969 | -2.04343 | 0.18038  |
| C | 4.87034  | 2.63317  | 0.61843  |
| H | 5.75046  | 2.81898  | -0.00092 |
| H | 5.07727  | 1.83621  | 1.34087  |
| H | 4.58502  | 3.54453  | 1.15274  |

|   |         |          |          |   |          |          |          |
|---|---------|----------|----------|---|----------|----------|----------|
| O | 3.85051 | 2.24685  | -0.27654 | H | -6.49765 | -2.56912 | 1.27656  |
| O | 2.69150 | 2.02756  | 0.46107  | H | -0.34493 | -1.89163 | 0.11687  |
| C | 2.31141 | -1.30843 | -0.04511 | C | 4.26490  | 3.22903  | 0.50399  |
| H | 1.94967 | -2.03989 | -0.78202 | H | 5.07155  | 3.51322  | -0.17525 |
| H | 2.03955 | -1.70532 | 0.94531  | H | 4.60448  | 2.44262  | 1.18663  |
| C | 3.82455 | -1.18832 | -0.15302 | H | 3.93472  | 4.09722  | 1.08246  |
| C | 4.52375 | -2.53371 | 0.02051  | O | 3.22047  | 2.76104  | -0.32072 |
| H | 4.18324 | -0.48329 | 0.60456  | O | 2.14478  | 2.42439  | 0.49536  |
| H | 4.08056 | -0.75413 | -1.12555 | C | 2.04456  | -0.92564 | -0.06600 |
| C | 6.04191 | -2.42697 | -0.07424 | H | 1.78014  | -1.64569 | -0.85419 |
| H | 4.24818 | -2.96730 | 0.99012  | H | 1.78528  | -1.40395 | 0.89100  |
| H | 4.15983 | -3.23465 | -0.74143 | C | 3.54022  | -0.64867 | -0.11240 |
| H | 6.34902 | -2.02245 | -1.04358 | C | 4.36809  | -1.92698 | -0.02237 |
| H | 6.44075 | -1.76525 | 0.70083  | H | 3.80337  | 0.02418  | 0.71112  |
| H | 6.51894 | -3.40339 | 0.04518  | H | 3.77432  | -0.11204 | -1.03819 |

**[Compound 6] \_TS**

|   |          |          |          |
|---|----------|----------|----------|
| N | 1.26576  | 0.27578  | -0.26475 |
| H | 1.75120  | 1.35258  | 0.00649  |
| C | -0.08448 | 0.24739  | -0.19059 |
| C | -0.84464 | -0.93808 | -0.00021 |
| C | -0.78233 | 1.48005  | -0.33788 |
| C | -2.22433 | -0.88662 | 0.02907  |
| C | -2.15920 | 1.51606  | -0.28721 |
| H | -0.20333 | 2.38484  | -0.48411 |
| C | -2.89880 | 0.33677  | -0.10972 |
| H | -2.79813 | -1.79533 | 0.16537  |
| H | -2.69494 | 2.45229  | -0.39419 |
| C | -4.37713 | 0.43574  | -0.08012 |
| O | -4.99290 | 1.47516  | -0.20034 |
| O | -4.97249 | -0.75579 | 0.09597  |
| C | -6.40918 | -0.73771 | 0.13701  |
| H | -6.72711 | -0.07946 | 0.94988  |
| H | -6.78008 | -0.31066 | -0.79851 |
| C | -6.87923 | -2.15827 | 0.33894  |
| H | -7.97137 | -2.18202 | 0.37486  |
| H | -6.55036 | -2.80135 | -0.48071 |

|   |          |          |          |
|---|----------|----------|----------|
| H | -6.49765 | -2.56912 | 1.27656  |
| H | -0.34493 | -1.89163 | 0.11687  |
| C | 4.26490  | 3.22903  | 0.50399  |
| H | 5.07155  | 3.51322  | -0.17525 |
| H | 4.60448  | 2.44262  | 1.18663  |
| H | 3.93472  | 4.09722  | 1.08246  |
| O | 3.22047  | 2.76104  | -0.32072 |
| O | 2.14478  | 2.42439  | 0.49536  |
| C | 2.04456  | -0.92564 | -0.06600 |
| H | 1.78014  | -1.64569 | -0.85419 |
| H | 1.78528  | -1.40395 | 0.89100  |
| C | 3.54022  | -0.64867 | -0.11240 |
| C | 4.36809  | -1.92698 | -0.02237 |
| H | 3.80337  | 0.02418  | 0.71112  |
| H | 3.77432  | -0.11204 | -1.03819 |
| C | 5.87305  | -1.67092 | -0.04210 |
| H | 4.10892  | -2.47214 | 0.89549  |
| H | 4.10619  | -2.59269 | -0.85588 |
| C | 6.69883  | -2.95067 | 0.02819  |
| H | 6.13166  | -1.11676 | -0.95276 |
| H | 6.13811  | -1.01653 | 0.79746  |
| H | 7.77083  | -2.73620 | 0.01221  |
| H | 6.48622  | -3.50969 | 0.94509  |
| H | 6.47979  | -3.60946 | -0.81809 |

**[Compound 7] \_TS**

|   |          |          |          |
|---|----------|----------|----------|
| N | 1.36262  | 0.15127  | -0.21881 |
| H | 1.87638  | 1.22433  | 0.02084  |
| C | 0.01060  | 0.16955  | -0.16766 |
| C | -0.79076 | -0.97903 | 0.07260  |
| C | -0.64401 | 1.41407  | -0.39174 |
| C | -2.16829 | -0.88191 | 0.07694  |
| C | -2.01960 | 1.49704  | -0.36501 |
| H | -0.03378 | 2.29086  | -0.57617 |
| C | -2.80002 | 0.35335  | -0.13694 |
| H | -2.77348 | -1.76313 | 0.25229  |
| H | -2.52260 | 2.44303  | -0.52955 |

|   |          |          |          |   |          |          |          |
|---|----------|----------|----------|---|----------|----------|----------|
| C | -4.27470 | 0.50147  | -0.13443 | C | -0.22191 | -1.14769 | -0.47050 |
| O | -4.85389 | 1.55335  | -0.31318 | C | 1.60322  | 0.91882  | -0.01840 |
| O | -4.91113 | -0.66031 | 0.08925  | C | 1.12423  | -1.42947 | -0.37528 |
| C | -6.34695 | -0.59416 | 0.10974  | H | -0.94611 | -1.93469 | -0.64724 |
| H | -6.65290 | 0.10487  | 0.89264  | C | 2.05443  | -0.40264 | -0.15448 |
| H | -6.69198 | -0.19160 | -0.84627 | H | 2.32321  | 1.70977  | 0.15337  |
| C | -6.86585 | -1.98990 | 0.35932  | H | 1.48858  | -2.44517 | -0.47794 |
| H | -7.95850 | -1.97663 | 0.38252  | C | 3.48997  | -0.76342 | -0.07469 |
| H | -6.54923 | -2.67404 | -0.43138 | O | 3.91559  | -1.89431 | -0.19167 |
| H | -6.50856 | -2.37706 | 1.31640  | O | 4.27943  | 0.30130  | 0.14377  |
| H | -0.32477 | -1.94061 | 0.24846  | C | 5.68783  | 0.02932  | 0.23718  |
| C | 4.43471  | 3.04066  | 0.51263  | H | 5.85173  | -0.69203 | 1.04205  |
| H | 5.26836  | 3.26635  | -0.15564 | H | 6.01650  | -0.43565 | -0.69604 |
| H | 4.72853  | 2.27501  | 1.23869  | C | 6.39003  | 1.34053  | 0.49721  |
| H | 4.11918  | 3.94439  | 1.04278  | H | 7.46697  | 1.17136  | 0.57564  |
| O | 3.39715  | 2.57066  | -0.31986 | H | 6.21368  | 2.04898  | -0.31552 |
| O | 2.29188  | 2.29832  | 0.47962  | H | 6.04604  | 1.79143  | 1.43093  |
| C | 2.09482  | -1.06299 | 0.05963  | H | -0.06896 | 2.24114  | 0.02577  |
| H | 1.80770  | -1.82213 | -0.68234 | C | -5.51574 | -1.55274 | 0.76704  |
| H | 1.81523  | -1.46924 | 1.04412  | H | -6.43577 | -1.70901 | 0.19972  |
| C | 3.59980  | -0.84327 | 0.00523  | H | -5.53772 | -0.57845 | 1.26549  |
| C | 4.37308  | -2.14732 | 0.22171  | H | -5.38828 | -2.34822 | 1.50696  |
| H | 3.88215  | -0.11270 | 0.77061  | O | -4.47290 | -1.59704 | -0.18544 |
| H | 3.87028  | -0.40498 | -0.96009 | O | -3.26628 | -1.47529 | 0.48862  |
| C | 5.85653  | -1.93946 | 0.24919  | C | -2.57801 | 1.71841  | -0.25073 |
| H | 4.05731  | -2.59404 | 1.17503  | C | -4.05762 | 1.74864  | -0.48474 |
| H | 4.11861  | -2.86923 | -0.56309 | H | -2.09523 | 2.39688  | -0.97059 |
| H | 6.22887  | -1.26830 | 1.02326  | H | -2.34572 | 2.10757  | 0.75140  |
| C | 6.72699  | -2.49873 | -0.59109 | C | -4.92569 | 2.35792  | 0.32044  |
| H | 7.79167  | -2.30403 | -0.51894 | H | -4.40300 | 1.25290  | -1.38912 |
| H | 6.40296  | -3.17243 | -1.37984 | H | -5.98457 | 2.39118  | 0.08832  |
|   |          |          |          | H | -4.60769 | 2.84808  | 1.23668  |

**[Compound 8]\_TS**

|   |          |          |          |
|---|----------|----------|----------|
| N | -2.02956 | 0.39425  | -0.45005 |
| H | -2.70508 | -0.56778 | -0.09509 |
| C | -0.69438 | 0.18663  | -0.32937 |
| C | 0.25556  | 1.21480  | -0.09314 |

**[Compound 9]\_TS**

|   |          |          |          |
|---|----------|----------|----------|
| N | -2.09991 | 0.52583  | -0.34674 |
| H | -2.77855 | -0.45089 | 0.00730  |
| C | -0.76516 | 0.28857  | -0.25835 |

|                          |          |          |          |   |          |          |          |
|--------------------------|----------|----------|----------|---|----------|----------|----------|
| C                        | 0.20825  | 1.27132  | 0.06044  | C | 0.38591  | -1.74304 | -0.73293 |
| C                        | -0.32163 | -1.03569 | -0.52777 | C | 1.83531  | 0.30555  | 0.49546  |
| C                        | 1.55054  | 0.94387  | 0.08854  | C | 1.75953  | -1.72001 | -0.83504 |
| C                        | 1.01956  | -1.35098 | -0.47791 | H | -0.19416 | -2.52703 | -1.20748 |
| H                        | -1.06362 | -1.78878 | -0.76569 | C | 2.50229  | -0.69596 | -0.22600 |
| C                        | 1.97296  | -0.36738 | -0.17616 | H | 2.41027  | 1.10082  | 0.95413  |
| H                        | 2.28832  | 1.70163  | 0.32295  | H | 2.29004  | -2.48419 | -1.39139 |
| H                        | 1.36138  | -2.35975 | -0.67899 | C | 3.97633  | -0.71518 | -0.38178 |
| C                        | 3.40202  | -0.76182 | -0.15112 | O | 4.58396  | -1.56256 | -1.00372 |
| O                        | 3.80100  | -1.88693 | -0.37100 | O | 4.57607  | 0.31118  | 0.24300  |
| O                        | 4.21670  | 0.26453  | 0.14305  | C | 6.00882  | 0.35967  | 0.13580  |
| C                        | 5.62053  | -0.04277 | 0.18888  | H | 6.42090  | -0.56785 | 0.54197  |
| H                        | 5.78265  | -0.82199 | 0.93830  | H | 6.27843  | 0.40611  | -0.92262 |
| H                        | 5.92101  | -0.44835 | -0.78073 | C | 6.48356  | 1.57418  | 0.89694  |
| C                        | 6.35710  | 1.23155  | 0.52537  | H | 7.57271  | 1.64273  | 0.83634  |
| H                        | 7.43093  | 1.03334  | 0.57184  | H | 6.05987  | 2.49030  | 0.47899  |
| H                        | 6.18377  | 1.99803  | -0.23356 | H | 6.20323  | 1.51189  | 1.95098  |
| H                        | 6.04006  | 1.62462  | 1.49410  | H | -0.03833 | 1.07795  | 1.16737  |
| H                        | -0.08934 | 2.28918  | 0.28037  | C | -4.64114 | -3.58765 | 0.84731  |
| C                        | -5.56093 | -1.51590 | 0.74632  | H | -5.70771 | -3.39758 | 0.71023  |
| H                        | -6.43538 | -1.75750 | 0.13880  | H | -4.32761 | -3.28738 | 1.85275  |
| H                        | -5.64911 | -0.50439 | 1.15409  | H | -4.42541 | -4.64962 | 0.69769  |
| H                        | -5.45179 | -2.24001 | 1.55882  | O | -3.98839 | -2.80989 | -0.13447 |
| O                        | -4.45824 | -1.59702 | -0.13466 | O | -2.61899 | -3.04021 | -0.02063 |
| O                        | -3.30271 | -1.36286 | 0.58940  | C | -2.42215 | 0.07242  | 0.90203  |
| C                        | -2.59467 | 1.84371  | -0.00378 | C | -2.65935 | 1.43781  | 0.28219  |
| C                        | -4.03369 | 1.97588  | -0.20366 | C | -2.74261 | 2.56620  | 1.10067  |
| H                        | -2.09246 | 2.58993  | -0.63385 | C | -2.83809 | 1.58516  | -1.09511 |
| H                        | -2.35386 | 2.10446  | 1.03837  | C | -3.00520 | 3.82124  | 0.55562  |
| C                        | -5.21883 | 2.14132  | -0.35905 | H | -2.60189 | 2.46450  | 2.17364  |
| H                        | -6.26495 | 2.27794  | -0.50974 | C | -3.09501 | 2.83989  | -1.64124 |
|                          |          |          |          | H | -2.77010 | 0.71353  | -1.73753 |
|                          |          |          |          | C | -3.18071 | 3.96161  | -0.81879 |
|                          |          |          |          | H | -3.06659 | 4.68855  | 1.20484  |
|                          |          |          |          | H | -3.22888 | 2.94108  | -2.71327 |
|                          |          |          |          | H | -3.37970 | 4.93846  | -1.24663 |
|                          |          |          |          | H | -1.95769 | 0.19869  | 1.88892  |
|                          |          |          |          | H | -3.38814 | -0.41790 | 1.06016  |
| <b>[Compound 10] _TS</b> |          |          |          |   |          |          |          |
| N                        | -1.65241 | -0.81968 | 0.06268  |   |          |          |          |
| H                        | -2.15411 | -1.91999 | -0.11667 |   |          |          |          |
| C                        | -0.30217 | -0.74293 | 0.00914  |   |          |          |          |
| C                        | 0.45975  | 0.28546  | 0.62330  |   |          |          |          |



**[Compound 11] \_TS**

|   |          |          |          |
|---|----------|----------|----------|
| N | -1.33566 | -1.26852 | 0.08644  |
| H | -1.69776 | -2.40604 | -0.16754 |
| C | -0.00820 | -1.01538 | 0.01387  |
| C | 0.63490  | 0.05391  | 0.69100  |
| C | 0.77977  | -1.86244 | -0.81423 |
| C | 1.99337  | 0.25736  | 0.54208  |
| C | 2.13658  | -1.65827 | -0.93721 |
| H | 0.28983  | -2.67618 | -1.33772 |
| C | 2.76132  | -0.59600 | -0.26441 |
| H | 2.47645  | 1.08291  | 1.05051  |
| H | 2.74368  | -2.30624 | -1.55890 |
| C | 4.22160  | -0.41828 | -0.44537 |
| O | 4.91416  | -1.13744 | -1.13635 |
| O | 4.70524  | 0.63025  | 0.24086  |
| C | 6.11762  | 0.86451  | 0.11252  |
| H | 6.65172  | -0.02775 | 0.44981  |
| H | 6.35244  | 1.01059  | -0.94509 |
| C | 6.45756  | 2.07842  | 0.94356  |
| H | 7.52797  | 2.28636  | 0.86868  |
| H | 5.91304  | 2.95874  | 0.59429  |
| H | 6.21401  | 1.91509  | 1.99594  |
| H | 0.05553  | 0.73461  | 1.30185  |
| C | -3.93176 | -4.43818 | 0.70934  |
| H | -5.01694 | -4.37191 | 0.60654  |
| H | -3.62958 | -4.17201 | 1.72779  |
| H | -3.59271 | -5.45268 | 0.47976  |
| O | -3.40571 | -3.51984 | -0.22574 |
| O | -2.01563 | -3.58271 | -0.15061 |
| C | -2.19082 | -0.54422 | 1.00268  |
| C | -2.61272 | 0.81855  | 0.48582  |
| C | -2.75202 | 1.89128  | 1.36484  |
| C | -2.90929 | 1.02102  | -0.86475 |
| C | -3.18261 | 3.13625  | 0.90863  |
| H | -2.52480 | 1.75843  | 2.41954  |
| C | -3.33270 | 2.26551  | -1.31578 |

|   |          |          |          |
|---|----------|----------|----------|
| H | -2.80209 | 0.19823  | -1.56407 |
| C | -3.47862 | 3.34698  | -0.43887 |
| H | -3.28374 | 3.95639  | 1.61361  |
| H | -3.55519 | 2.40041  | -2.37067 |
| H | -1.71986 | -0.42928 | 1.98774  |
| H | -3.08093 | -1.16623 | 1.14077  |
| C | -3.93536 | 4.68897  | -0.94177 |
| H | -4.01369 | 5.41348  | -0.12848 |
| H | -3.23854 | 5.09212  | -1.68310 |
| H | -4.91542 | 4.61871  | -1.42335 |

**[Compound 12] \_TS**

|   |          |          |          |
|---|----------|----------|----------|
| N | 1.34562  | 1.23005  | 0.08966  |
| H | 1.72461  | 2.36697  | -0.15502 |
| C | 0.01452  | 0.99402  | 0.01915  |
| C | -0.64157 | -0.06831 | 0.69454  |
| C | -0.76347 | 1.85260  | -0.80647 |
| C | -2.00257 | -0.25487 | 0.54608  |
| C | -2.12275 | 1.66545  | -0.92912 |
| H | -0.26393 | 2.66121  | -1.32884 |
| C | -2.76008 | 0.60951  | -0.25832 |
| H | -2.49572 | -1.07532 | 1.05306  |
| H | -2.72223 | 2.32199  | -1.54920 |
| C | -4.22294 | 0.44974  | -0.43951 |
| O | -4.90598 | 1.18007  | -1.12795 |
| O | -4.71818 | -0.59513 | 0.24291  |
| C | -6.13352 | -0.81349 | 0.11384  |
| H | -6.65735 | 0.08330  | 0.45509  |
| H | -6.36964 | -0.95238 | -0.94439 |
| C | -6.48653 | -2.02713 | 0.93965  |
| H | -7.55918 | -2.22276 | 0.86404  |
| H | -5.95209 | -2.91195 | 0.58630  |
| H | -6.24115 | -1.87113 | 1.99270  |
| H | -0.07156 | -0.75688 | 1.30542  |
| C | 4.00042  | 4.35157  | 0.72983  |
| H | 5.08378  | 4.26003  | 0.62828  |
| H | 3.69109  | 4.09874  | 1.74942  |

|   |         |          |          |   |          |          |          |
|---|---------|----------|----------|---|----------|----------|----------|
| H | 3.68434 | 5.37159  | 0.49277  | H | -7.38571 | -3.06509 | 0.92566  |
| O | 3.45460 | 3.43887  | -0.20021 | H | -5.68848 | -3.51773 | 0.70411  |
| O | 2.06681 | 3.53313  | -0.12761 | H | -6.15795 | -2.46319 | 2.05036  |
| C | 2.19288 | 0.48995  | 0.99959  | H | -0.20480 | -0.49637 | 1.35983  |
| C | 2.61128 | -0.86723 | 0.46437  | C | 3.05965  | 5.14065  | 0.63548  |
| C | 2.76858 | -1.94526 | 1.33735  | H | 4.14756  | 5.21107  | 0.57399  |
| C | 2.88564 | -1.05309 | -0.89303 | H | 2.75119  | 4.89525  | 1.65715  |
| C | 3.19626 | -3.18843 | 0.87662  | H | 2.60291  | 6.08688  | 0.33138  |
| H | 2.55678 | -1.81897 | 2.39541  | O | 2.69592  | 4.10940  | -0.25926 |
| C | 3.30825 | -2.28872 | -1.37355 | O | 1.30765  | 3.99885  | -0.24177 |
| H | 2.76214 | -0.22366 | -1.58100 | C | 1.85048  | 1.06398  | 1.03033  |
| C | 3.45675 | -3.33424 | -0.47572 | C | 2.47932  | -0.23803 | 0.56990  |
| H | 3.32081 | -4.03183 | 1.54529  | C | 2.85886  | -1.19789 | 1.50955  |
| H | 3.52120 | -2.44647 | -2.42419 | C | 2.72937  | -0.48578 | -0.78100 |
| H | 1.71873 | 0.36286  | 1.98150  | C | 3.48042  | -2.38066 | 1.11907  |
| H | 3.08579 | 1.10518  | 1.14992  | H | 2.66982  | -1.02596 | 2.56560  |
| F | 3.86437 | -4.53542 | -0.93479 | C | 3.34532  | -1.66509 | -1.18825 |

**[Compound 13] \_TS**

|   |          |          |          |
|---|----------|----------|----------|
| N | 0.92303  | 1.62802  | 0.07526  |
| H | 1.13965  | 2.79753  | -0.21968 |
| C | -0.35844 | 1.19707  | 0.00372  |
| C | -0.86056 | 0.07676  | 0.71645  |
| C | -1.24237 | 1.89860  | -0.86261 |
| C | -2.17672 | -0.31511 | 0.56333  |
| C | -2.55723 | 1.50771  | -0.98930 |
| H | -0.86057 | 2.75197  | -1.41247 |
| C | -3.04149 | 0.39573  | -0.28207 |
| H | -2.55036 | -1.17978 | 1.09824  |
| H | -3.23795 | 2.04381  | -1.64056 |
| C | -4.46170 | 0.01326  | -0.47033 |
| O | -5.23395 | 0.60444  | -1.19691 |
| O | -4.80731 | -1.06358 | 0.25286  |
| C | -6.17208 | -1.49677 | 0.11998  |
| H | -6.82939 | -0.67217 | 0.40803  |
| H | -6.36531 | -1.72237 | -0.93208 |
| C | -6.35613 | -2.70674 | 1.00401  |

|    |          |          |          |
|----|----------|----------|----------|
| H  | -7.38571 | -3.06509 | 0.92566  |
| H  | -5.68848 | -3.51773 | 0.70411  |
| H  | -6.15795 | -2.46319 | 2.05036  |
| H  | -0.20480 | -0.49637 | 1.35983  |
| C  | 3.05965  | 5.14065  | 0.63548  |
| H  | 4.14756  | 5.21107  | 0.57399  |
| H  | 2.75119  | 4.89525  | 1.65715  |
| H  | 2.60291  | 6.08688  | 0.33138  |
| O  | 2.69592  | 4.10940  | -0.25926 |
| O  | 1.30765  | 3.99885  | -0.24177 |
| C  | 1.85048  | 1.06398  | 1.03033  |
| C  | 2.47932  | -0.23803 | 0.56990  |
| C  | 2.85886  | -1.19789 | 1.50955  |
| C  | 2.72937  | -0.48578 | -0.78100 |
| C  | 3.48042  | -2.38066 | 1.11907  |
| H  | 2.66982  | -1.02596 | 2.56560  |
| C  | 3.34532  | -1.66509 | -1.18825 |
| H  | 2.43516  | 0.24913  | -1.52260 |
| C  | 3.71811  | -2.60516 | -0.23265 |
| H  | 3.77173  | -3.12246 | 1.85325  |
| H  | 3.53515  | -1.85455 | -2.23814 |
| H  | 1.38043  | 0.91215  | 2.01093  |
| H  | 2.64079  | 1.81013  | 1.16340  |
| Cl | 4.48692  | -4.08484 | -0.73508 |

**[SRS8-71]\_TS**

|   |          |          |          |
|---|----------|----------|----------|
| C | 1.73050  | -0.97479 | -0.11829 |
| C | 2.18969  | 0.35764  | -0.19310 |
| C | 1.28301  | 1.37861  | -0.41888 |
| C | -0.08642 | 1.12512  | -0.60575 |
| C | -0.56064 | -0.23706 | -0.50599 |
| C | 0.39206  | -1.25777 | -0.26456 |
| H | 2.43809  | -1.77241 | 0.06942  |
| H | 1.65178  | 2.39801  | -0.47370 |
| H | 0.05189  | -2.28167 | -0.17675 |
| N | -0.93797 | 2.12638  | -0.94065 |
| H | -0.55203 | 3.05752  | -0.87848 |



|                     |          |          |          |                      |          |          |          |
|---------------------|----------|----------|----------|----------------------|----------|----------|----------|
| H                   | -5.56860 | -2.30359 | -0.16948 | C                    | -4.67086 | -1.99170 | 0.30949  |
|                     |          |          |          | H                    | -3.55509 | -2.48894 | 2.09909  |
|                     |          |          |          | H                    | -2.91166 | -3.19412 | 0.62426  |
| <b>[SRS8-48]_TS</b> |          |          |          | H                    | -5.31740 | -1.36861 | -1.66182 |
| C                   | 2.21465  | -0.95977 | -0.17673 | H                    | -3.98580 | -2.51342 | -1.66480 |
| C                   | 2.96388  | 0.23590  | -0.17627 | H                    | -5.13132 | -1.11427 | 0.78723  |
| C                   | 2.31246  | 1.44460  | -0.34966 | C                    | -3.09800 | 4.02896  | 1.40761  |
| C                   | 0.92427  | 1.51683  | -0.55317 | H                    | -3.51186 | 3.88643  | 2.40867  |
| C                   | 0.14984  | 0.29473  | -0.52146 | H                    | -3.84792 | 4.47665  | 0.74789  |
| C                   | 0.84904  | -0.92544 | -0.33786 | H                    | -2.21698 | 4.67920  | 1.45465  |
| H                   | 2.72140  | -1.90629 | -0.03704 | O                    | -2.74084 | 2.74377  | 0.95094  |
| H                   | 2.90095  | 2.35670  | -0.34943 | O                    | -2.23815 | 2.86197  | -0.33856 |
| H                   | 0.29298  | -1.85352 | -0.31517 | C                    | -5.64468 | -3.16057 | 0.41631  |
| N                   | 0.32850  | 2.70196  | -0.83899 | H                    | -5.86574 | -3.40068 | 1.46079  |
| H                   | 0.91751  | 3.51462  | -0.72674 | H                    | -6.59224 | -2.93625 | -0.08284 |
| H                   | -0.68880 | 2.86489  | -0.61058 | H                    | -5.22811 | -4.06010 | -0.05062 |
| N                   | -1.18641 | 0.35463  | -0.67072 |                      |          |          |          |
| H                   | -1.65106 | 1.28470  | -0.63211 | <b>[SRS13-10]_TS</b> |          |          |          |
| C                   | 4.43137  | 0.25962  | 0.01252  | C                    | 2.85319  | -1.05887 | -0.17688 |
| O                   | 5.10595  | 1.27013  | 0.02257  | C                    | 3.80008  | -0.01355 | -0.13593 |
| O                   | 4.95056  | -0.96969 | 0.17665  | C                    | 3.37209  | 1.29526  | -0.27666 |
| C                   | 6.37263  | -1.02774 | 0.37053  | C                    | 2.02120  | 1.61531  | -0.48949 |
| H                   | 6.86271  | -0.56822 | -0.49197 | C                    | 1.04498  | 0.54729  | -0.50395 |
| H                   | 6.63046  | -0.43432 | 1.25185  | C                    | 1.51697  | -0.78107 | -0.34849 |
| C                   | 6.75341  | -2.47998 | 0.53296  | H                    | 3.18440  | -2.08309 | -0.06073 |
| H                   | 6.48633  | -3.05781 | -0.35493 | H                    | 4.11137  | 2.08944  | -0.24546 |
| H                   | 7.83301  | -2.56252 | 0.68265  | H                    | 0.80580  | -1.59671 | -0.35614 |
| H                   | 6.25369  | -2.92289 | 1.39765  | N                    | 1.64733  | 2.89432  | -0.74589 |
| C                   | -2.08755 | -0.77861 | -0.54696 | H                    | 2.36671  | 3.58842  | -0.60339 |
| C                   | -2.36648 | -1.12364 | 0.92292  | H                    | 0.67025  | 3.22707  | -0.53520 |
| C                   | -3.39325 | -0.47153 | -1.28117 | N                    | -0.25681 | 0.84433  | -0.66952 |
| H                   | -1.62228 | -1.64446 | -1.03547 | H                    | -0.55403 | 1.84026  | -0.61851 |
| C                   | -3.35748 | -2.27945 | 1.04177  | C                    | 5.24745  | -0.25210 | 0.05780  |
| H                   | -2.77026 | -0.22786 | 1.40942  | O                    | 6.08803  | 0.62430  | 0.09983  |
| H                   | -1.42878 | -1.36508 | 1.43414  | O                    | 5.54307  | -1.55751 | 0.18508  |
| C                   | -4.38371 | -1.62688 | -1.14989 | C                    | 6.93237  | -1.86899 | 0.37509  |
| H                   | -3.82658 | 0.44384  | -0.86038 | H                    | 7.49834  | -1.47784 | -0.47458 |
| H                   | -3.17927 | -0.26515 | -2.33476 |                      |          |          |          |



|   |         |          |          |   |          |          |          |
|---|---------|----------|----------|---|----------|----------|----------|
| C | 3.33623 | -0.53357 | -1.10543 | H | 7.04170  | -0.54755 | -0.80605 |
| C | 3.30489 | -2.01130 | 1.52231  | H | 7.04738  | 0.15134  | 0.81384  |
| H | 2.30144 | -3.15338 | 0.00053  | C | 7.22078  | -2.01342 | 0.78659  |
| H | 1.20984 | -2.26951 | 1.04224  | H | 6.87574  | -2.85915 | 0.18722  |
| H | 3.71696 | 0.23282  | -0.42093 | H | 8.31381  | -2.01534 | 0.78367  |
| H | 3.10467 | -0.00321 | -2.03395 | H | 6.88131  | -2.15667 | 1.81508  |
| C | 4.43949 | -1.56908 | -1.34378 | C | -2.91230 | 4.32580  | 0.75233  |
| C | 4.64222 | -2.57977 | 1.03790  | H | -3.17250 | 4.62627  | 1.76990  |
| H | 3.40989 | -0.95309 | 1.79240  | H | -3.78513 | 4.40987  | 0.09722  |
| H | 3.03234 | -2.52970 | 2.44783  | H | -2.10460 | 4.95950  | 0.36861  |
| C | 5.31214 | -1.82928 | -0.11247 | O | -2.48915 | 2.98362  | 0.84362  |
| H | 4.01770 | -2.51016 | -1.72085 | O | -2.17870 | 2.53500  | -0.43120 |
| H | 5.08836 | -1.19482 | -2.14273 | C | -1.79297 | -1.01051 | 0.58559  |
| H | 5.34290 | -2.61345 | 1.88035  | C | -1.99165 | -2.10948 | -0.47846 |
| H | 4.47938 | -3.62476 | 0.73991  | H | -1.23377 | -1.46230 | 1.41546  |
| H | 5.67591 | -0.86050 | 0.25406  | C | -3.08084 | -0.41941 | 1.16607  |
| H | 6.20311 | -2.39123 | -0.41683 | C | -2.96966 | -1.81606 | -1.62355 |

**[SRS8-70]\_TS**

|   |          |          |          |
|---|----------|----------|----------|
| C | 2.52640  | -0.92719 | 0.34306  |
| C | 3.17651  | 0.22001  | -0.15725 |
| C | 2.41742  | 1.28484  | -0.61126 |
| C | 1.01315  | 1.24846  | -0.61166 |
| C | 0.34438  | 0.09612  | -0.04617 |
| C | 1.15228  | -0.98255 | 0.39514  |
| H | 3.11674  | -1.76391 | 0.69470  |
| H | 2.92962  | 2.15773  | -1.00367 |
| H | 0.67729  | -1.87056 | 0.79047  |
| N | 0.29948  | 2.24252  | -1.19797 |
| H | 0.83778  | 3.05415  | -1.46544 |
| H | -0.69194 | 2.45447  | -0.90127 |
| N | -0.99836 | 0.08729  | 0.04891  |
| H | -1.51951 | 0.95792  | -0.16649 |
| C | 4.64973  | 0.34154  | -0.21942 |
| O | 5.24106  | 1.31523  | -0.64211 |
| O | 5.27792  | -0.75118 | 0.24877  |
| C | 6.71337  | -0.70684 | 0.22454  |

|   |          |          |          |
|---|----------|----------|----------|
| H | -2.28587 | -3.03945 | 0.02146  |
| H | -1.00299 | -2.30955 | -0.90523 |
| H | -3.52454 | 0.24640  | 0.42022  |
| H | -2.80373 | 0.23156  | 1.99962  |
| C | -4.09986 | -1.48134 | 1.60714  |
| C | -4.44169 | -2.22588 | -1.43103 |
| H | -2.91680 | -0.75518 | -1.89971 |
| H | -2.60198 | -2.36072 | -2.49991 |
| C | -5.43460 | -1.42005 | 0.85663  |
| H | -3.67060 | -2.48147 | 1.48859  |
| H | -4.30205 | -1.38363 | 2.67850  |
| C | -5.35608 | -1.25877 | -0.66554 |
| H | -4.86449 | -2.34223 | -2.43520 |
| H | -4.48632 | -3.22601 | -0.97782 |
| H | -6.02799 | -0.58497 | 1.24927  |
| H | -6.00350 | -2.32860 | 1.09029  |
| H | -5.06912 | -0.23158 | -0.92080 |
| H | -6.37698 | -1.37197 | -1.04821 |

**[SRS8-94]\_TS**

|   |          |          |          |   |                     |          |          |
|---|----------|----------|----------|---|---------------------|----------|----------|
| C | 3.22731  | -1.23653 | 0.01997  | H | -3.32408            | -1.84492 | -0.75136 |
| C | 4.13252  | -0.16663 | -0.14623 | H | -3.31842            | -1.45550 | 0.96077  |
| C | 3.64608  | 1.10145  | -0.41257 | H | -5.01340            | 0.33936  | 0.56438  |
| C | 2.27044  | 1.35421  | -0.55003 | H | -5.01124            | -0.02879 | -1.15032 |
| C | 1.34026  | 0.26511  | -0.34382 | C | -5.95092            | -1.53738 | 0.06806  |
| C | 1.87152  | -1.02116 | -0.07341 | C | -7.37401            | -0.99697 | -0.04372 |
| H | 3.60747  | -2.22811 | 0.23067  | H | -5.81244            | -1.98975 | 1.05931  |
| H | 4.35495  | 1.91324  | -0.54178 | H | -5.81471            | -2.35038 | -0.65776 |
| H | 1.19070  | -1.85030 | 0.07036  | C | -8.44880            | -2.05947 | 0.17161  |
| N | 1.82638  | 2.57613  | -0.93191 | H | -7.51378            | -0.18843 | 0.68631  |
| H | 2.52516  | 3.30505  | -0.94264 | H | -7.51190            | -0.53878 | -1.03234 |
| H | 0.84937  | 2.90015  | -0.69307 | C | -9.86704            | -1.51015 | 0.06043  |
| N | 0.01770  | 0.49343  | -0.40678 | H | -8.31016            | -2.86588 | -0.55953 |
| H | -0.33008 | 1.47634  | -0.46020 | H | -8.30980            | -2.51827 | 1.15865  |
| C | 5.59922  | -0.33822 | -0.04299 | H | -10.61430           | -2.29298 | 0.21769  |
| O | 6.40627  | 0.55949  | -0.18003 | H | -10.04664           | -0.72605 | 0.80290  |
| O | 5.95232  | -1.60753 | 0.22320  | H | -10.04570           | -1.07444 | -0.92781 |
| C | 7.36280  | -1.85441 | 0.33952  |   |                     |          |          |
| H | 7.84764  | -1.56243 | -0.59583 |   | <b>[SRS8-80]_TS</b> |          |          |
| H | 7.76533  | -1.21885 | 1.13277  |   |                     |          |          |
| C | 7.54653  | -3.32283 | 0.64005  | C | 2.21468             | -0.95850 | -0.17258 |
| H | 7.13713  | -3.94201 | -0.16154 | C | 2.95881             | 0.24021  | -0.17706 |
| H | 8.61176  | -3.54803 | 0.73627  | C | 2.30223             | 1.44558  | -0.35457 |
| H | 7.05325  | -3.59676 | 1.57555  | C | 0.91382             | 1.51097  | -0.55772 |
| C | -1.36959 | 4.62171  | 1.15945  | C | 0.14488             | 0.28590  | -0.52213 |
| H | -1.75969 | 4.68120  | 2.17828  | C | 0.84878             | -0.93051 | -0.33337 |
| H | -2.10034 | 5.02297  | 0.45002  | H | 2.72537             | -1.90242 | -0.02971 |
| H | -0.43496 | 5.18888  | 1.08176  | H | 2.88693             | 2.36011  | -0.35792 |
| O | -1.14032 | 3.25288  | 0.91377  | H | 0.29680             | -1.86097 | -0.30751 |
| O | -0.67018 | 3.11686  | -0.38814 | N | 0.31259             | 2.69298  | -0.84689 |
| C | -0.97915 | -0.52682 | -0.15635 | H | 0.89788             | 3.50856  | -0.73666 |
| C | -2.38616 | 0.04062  | -0.28325 | H | -0.70395            | 2.85217  | -0.61759 |
| H | -0.83788 | -0.94944 | 0.84920  | N | -1.19175            | 0.33992  | -0.67393 |
| H | -0.84444 | -1.35050 | -0.87048 | H | -1.66037            | 1.26753  | -0.63481 |
| C | -3.45519 | -1.01994 | -0.03814 | C | 4.42640             | 0.27078  | 0.01058  |
| H | -2.50553 | 0.86777  | 0.42489  | O | 5.09652             | 1.28429  | 0.01689  |
| H | -2.51068 | 0.46952  | -1.28420 | O | 4.95084             | -0.95570 | 0.17809  |
| C | -4.87680 | -0.47665 | -0.15702 | C | 6.37342             | -1.00742 | 0.37032  |





|   |          |          |          |
|---|----------|----------|----------|
| H | -2.29403 | 4.73954  | 1.38752  |
| O | -2.51390 | 2.74650  | 0.88574  |
| O | -1.96901 | 2.93209  | -0.38327 |
| F | -5.10359 | -0.97278 | 0.82995  |
| F | -5.20488 | -3.05638 | 0.14890  |
